1 **Title: Distinct microbial and immune niches of the human colon**

2

3 **James KR<sup>1\*</sup>, Gomes T<sup>1</sup>, Elmentaite R<sup>1</sup>, Kumar N<sup>1</sup>, Gulliver EL<sup>2,3</sup>, King HW<sup>4</sup>,**  
4 **Stares MD<sup>1</sup>, Bareham BR<sup>5</sup>, Ferdinand JR<sup>6</sup>, Petrova VN<sup>1</sup>, Polanski K<sup>1</sup>, Forster**  
5 **SC<sup>1,2,3</sup>, Jarvis LB<sup>7</sup>, Suchanek O<sup>6</sup>, Howlett S<sup>7</sup>, James LK<sup>4</sup>, Jones JL<sup>7,8</sup>, Meyer**  
6 **KB<sup>1</sup>, Clatworthy MR<sup>6,7</sup>, Saeb-Parsy K<sup>5</sup>, Lawley TD<sup>1</sup>, Teichmann SA<sup>1,9,10\*</sup>**

7

8 **Affiliations:**

- 9 1. Wellcome Sanger Institute, Wellcome Genome Campus, Hinxton, United  
10 Kingdom, CB10 1SA
- 11 2. Centre for Innate Immunity and Infectious Diseases, Hudson Institute of  
12 Medical Research, Clayton, Victoria, Australia
- 13 3. Department of Molecular and Translational Sciences, Monash University,  
14 Clayton, Victoria, Australia
- 15 4. Centre for Immunobiology, Blizard Institute, Queen Mary University of  
16 London, United Kingdom, E1 2AT
- 17 5. Department of Surgery, University of Cambridge and NIHR Cambridge  
18 Biomedical Research Centre, United Kingdom, CB2 0QQ
- 19 6. Molecular Immunity Unit, Department of Medicine, University of Cambridge,  
20 MRC Laboratory of Molecular Biology, United Kingdom, CB2 0QQ
- 21 7. Department of Haematology, Clifford Allbutt Building, United Kingdom, CB2  
22 0AH
- 23 8. Cambridge University Hospitals NHS Foundation Trust, United Kingdom, CB2  
24 0QQ

25 9. Theory of Condensed Matter, Cavendish Laboratory, Department of Physics,  
26 University of Cambridge, Cambridge, United Kingdom, CB3 0HE

27 10. European Molecular Biology Laboratory, European Bioinformatics Institute  
28 (EMBL-EBI), Wellcome Genome Campus, Hinxton, United Kingdom, CB10  
29 1SA

30

31 \* Corresponding author

32

33

34

35

36

37

38

39

40

41

42 **Abstract:**

43 Gastrointestinal microbiota and immune cells interact closely and display regional  
44 specificity, but little is known about how these communities differ with location. Here,  
45 we simultaneously assess microbiota and single immune cells across the healthy,  
46 adult human colon, with paired characterisation of immune cells in the mesenteric  
47 lymph nodes, to delineate colonic immune niches at steady-state. We describe  
48 distinct T helper cell activation and migration profiles along the colon and  
49 characterise the transcriptional adaptation trajectory of T regulatory cells between  
50 lymphoid tissue and colon. Finally, we show increasing B cell accumulation, clonal  
51 expansion and mutational frequency from caecum to sigmoid colon, and link this to  
52 the increasing number of reactive bacterial species.

53

54 **Introduction:**

55 The colon, as a barrier tissue, represents a unique immune environment where  
56 immune cells display tolerance towards a diverse community of microbes -  
57 collectively known as the microbiome. The microbiome is critical for many aspects of  
58 health and an imbalance of commensals and pathogenic microbes is linked with  
59 many disease states <sup>1</sup>. Thus, understanding what constitutes a healthy, homeostatic  
60 relationship between host immune cells and the microbiome of the human colon is of  
61 critical importance. At a coarse-grained level, intestinal microbiota and immunity  
62 have been studied extensively. Here, we provide an in-depth map of proximal-to-  
63 distal changes in the colonic microbiome and host immune cells.

64

65 The composition of the microbiota at any location in the intestines is determined by  
66 the availability of nutrients, oxygen and the transit rate of luminal content, and as

67 such, is spatially distinct<sup>2</sup>. Regional differences are most evident when comparing  
68 the small intestine and distal colon in humans or other mammals<sup>3,4</sup>. Within the colon,  
69 early studies identified changes from proximal (including the caecum, ascending and  
70 transverse colon) to distal colon (comprising the descending and sigmoid colon  
71 connecting to the rectum). Changes were evident with respect to the growth rates  
72 and activities of some bacteria species, which were dependent on nutrient availability  
73 <sup>4</sup>. A proximal-to-distal gradient of bacterial diversity in which the number of  
74 operational taxonomic units (OTU) increases has been reported<sup>5</sup>.

75

76 The intestinal immune system has a symbiotic relationship with the microbiome and  
77 is central to the maintenance of epithelial barrier integrity. The lamina propria and  
78 associated lymphoid tissues contain one of the largest and most diverse  
79 communities of immune cells - including both lymphocytes and myeloid cells<sup>6</sup>. There  
80 is marked regional variation in immune cells along the gastrointestinal tract, with T  
81 helper (Th) 17 cells decreasing in number from duodenum to colon, and T regulatory  
82 (Treg) cells being highest in the colon<sup>7</sup>. Whether there is further complexity, with  
83 distinct immunological niches, within the colon remains to be elucidated. Immune  
84 cells can respond to environmental cues including the microbiota. Mouse studies  
85 have demonstrated that specific bacterial species can fine-tune intestinal immune  
86 responses, including Th17<sup>8,9</sup>, Treg<sup>10</sup>, or Th1<sup>11</sup> polarisation and function<sup>8,12</sup> and B  
87 cell activation<sup>13</sup>. However, the extent to which there is regional variation in the  
88 mucosal microbiome within an individual, and how this might influence local immune  
89 cell niches along the colon, has not been investigated to date.

90

91 Here, we catalogued the mucosal microbiome in different regions of the human  
92 colon, a gastrointestinal organ with the most diverse and dense microbiome content  
93 and region-restricted disease states <sup>14</sup>. In parallel, we applied single-cell RNA-seq  
94 (scRNA-seq) to make a census of steady-state immune cell populations in the  
95 adjacent tissue and in draining mesenteric lymph nodes (mLN), available at  
96 [www.gutcellatlas.org](http://www.gutcellatlas.org). We demonstrate previously unappreciated changes in the  
97 proportions and activation status of T and B cells in distinct regions of the healthy  
98 human colon from proximal to distal, and relate these differences to the changing  
99 microbiota.

100

101

102 **Results:**

103 **Microbiome composition differs along distinct colon regions**

104 To create a map of bacterial composition at the mucosal surface of the colon, we  
105 performed 16S ribosomal sequencing of swabs from the mucosa surface of the  
106 caecum, transverse colon and sigmoid colon of twelve disease-free Caucasian  
107 deceased transplant donors (Figure 1a & Supp Table 1). The major gut phyla -  
108 *Bacteroidetes*, *Firmicutes*, *Proteobacteria* and *Actinobacteria*, were present  
109 throughout the gut of each donor (Figure 1b & Supp Table 2). While diversity of  
110 OTUs was consistent across the colon, and significant variability existed between  
111 donor as previously reported<sup>15</sup> (Supp Figure 1a), we did observe changes in the  
112 composition of the microbiome. Most notably at the level of phyla, *Bacteroidetes* was  
113 more prevalent in sigmoid colon (Figure 1c & Supp Figure 1b). This was mostly  
114 attributable to an increase in *Bacteroides*, which dominates the colonic microbiome  
115 of individuals on high protein and fat diets typical in Western countries<sup>16</sup> (Figure 1c  
116 and Supp Figure 1a). Additionally, *Enterococcus* was more prevalent in the proximal  
117 colon, and *Coprobacillus* and *Shigella*, typically pathogenic, were more abundant in  
118 the distal colon, although these proportions varied considerably between donors  
119 (Figure 1b & 1c & Supp Figure 1c).

120

121 Past studies characterising the colonic microbiome typically rely on stool samples,  
122 which do not accurately recapitulate the composition of bacteria at the mucosal  
123 surface<sup>17</sup>. Our catalog of mucosal bacteria throughout the colon demonstrates  
124 heterogeneity in the microbiome at the mucosal surface from proximal to distal colon,  
125 and reveals specific genera with preference for colonising certain colon regions.

126

## 127 **Immune cell heterogeneity in steady-state colon**

128 Next, we sought to determine whether the heterogeneity we observed in the colonic  
129 microbiome was accompanied by differences in the adjacent host immune cells. To  
130 this end, we generated high-quality transcriptional data from over 41,000 single  
131 immune cells from the mLN and lamina propria of caecum, transverse colon and  
132 sigmoid colon (Figure 1a). We acquired tissue biopsies from five deceased  
133 transplant donors (Supp Table 1). Samples were dissociated to release cells from  
134 the mLN and lamina propria of colonic tissue. Immune cells were enriched either by  
135 fluorescence-activated cell sorting (FACS) of CD4<sup>+</sup> T cells (live CD45<sup>+</sup>CD3<sup>+</sup>CD4<sup>+</sup>)  
136 and other immune cells (live CD45<sup>+</sup>CD3<sup>-</sup>CD4<sup>-</sup>), or by CD45<sup>+</sup> magnetic bead selection  
137 or Ficoll gradient. Each fraction was then subjected to scRNA-seq (see Methods;  
138 Figure 1a & Supp. Figure 1d). Despite the enrichment for immune cells, we captured  
139 epithelial cells and fibroblasts and these were computationally removed from further  
140 analysis (see Methods).

141

142 Pooled analysis and visualisation with Uniform Manifold Approximation and  
143 Projection (UMAP) of all four tissues from all donors revealed distinct clusters in the  
144 lymphoid and colonic tissues (Figure 1d & Supp Figure 1e). We identified 25 cell  
145 types and states in the intestinal lamina propria and mLN (Figure 1d & Supp Table 3  
146 & Supp Table 4), consistent with the immune populations described in recent reports  
147 <sup>18</sup>. Among these were follicular and memory B cells, IgA<sup>+</sup> and IgG<sup>+</sup> plasma cells,  
148 effector and memory CD4<sup>+</sup> T cells, T regulatory (Treg) cells, CD8<sup>+</sup> T cells,  $\gamma\delta$  T cells,  
149 innate lymphoid cells (ILCs), natural killer (NK) cells, mast cells and myeloid cells  
150 (Figure 1d). Sub-clustering of myeloid cells showed two distinct populations of  
151 conventional dendritic cells: cDC1 expressing *XCR1*, *CADM1*, *CLEC9A*, *BATF3* and

152 *IDO1*, and cDC2 expressing *CLEC10A* and *CD86* (Figure 1d & 1e). In addition, we  
153 identified monocytes expressing *CD14* and *CD68*, macrophages expressing  
154 *FCGR3A* (gene encoding CD16), LYVE1 macrophages<sup>19</sup> and plasmacytoid DCs  
155 (pDCs) expressing *IRF4* and *SELL*. B cells, DCs and  $\gamma\delta$  T cells had *MKI67*<sup>+</sup> cycling  
156 populations suggesting higher rates of proliferation compared to other colonic  
157 immune cell populations (Figure 1d & 1e).

158

159 To determine how immune cells differ along the colon from proximal to distal regions,  
160 we investigated the relative proportions of cell types within mLN and colon regions  
161 (Figure 1f & 1g). Since CD4<sup>+</sup> T cells and all other immune cells were sorted  
162 separately during initial tissue processing, our analyses here were also kept  
163 separate. As noted from our visual inspection of the UMAP plot (Figure 1d), there  
164 were major differences in the cell types present between mLN and the colon. In  
165 particular, there were marked differences in the activation and memory status of T  
166 and B cells between the colon and lymph nodes, suggesting that these cell types are  
167 moulded by their environment (Figure 1f & 1g). In the mLN, CD4<sup>+</sup> T cells were  
168 typically *CXCR5*<sup>+</sup>, *ICOS*<sup>hi</sup> follicular helper cells, and *SELL*<sup>+</sup> (encodes CD62L), *CCR7*<sup>+</sup>  
169 central memory cells (Figure 1e and 1f). In contrast, colonic CD4<sup>+</sup> T cells had a more  
170 effector phenotype, expressing high levels of the tissue residency marker *CD69*<sup>20</sup>,  
171 falling into the Th17 (*CCR6*<sup>+</sup>, *IL22*<sup>+</sup>) or Th1 (*CXCR3*<sup>+</sup>, *IFNG*<sup>+</sup>) subtypes. There was  
172 an inverted gradient in the relative proportion of Th17 and Th1 cells, with the caecum  
173 dominated by Th17 cells that reduced in frequency in the transverse colon, and still  
174 further in the sigmoid colon, and Th1 cells following the opposite trend, being more  
175 abundant in the sigmoid colon (Figure 1f). This distinct distribution of colonic Th1 and



176 Th17 cells is concordant with spatial variation of the microbiome, hinting at a  
177 relationship between the two populations.

178

179 B cells in the mLN were predominantly *CD19*<sup>+</sup>, *MS4A1*<sup>+</sup> (encodes CD20), *CD40*<sup>+</sup>,  
180 *TNFRSF13B*<sup>+</sup> (encodes TACI), *CD38*<sup>+</sup> memory or *CXCR5*<sup>+</sup>, *TCL1A*<sup>+</sup>, *FCER2*<sup>+</sup>  
181 (encodes CD23) follicular B cells (Figure 1e and 1g). In contrast, in the three regions  
182 of the colon, the main population of B cells were *SDC1*<sup>+</sup> (encodes CD138), *CD38*<sup>+</sup>,  
183 plasma cells. Curiously, plasma cells were enriched in the sigmoid colon relative to  
184 both the caecum and transverse colon, whilst the proportion of memory B cells was  
185 lower in the sigmoid colon (Figure 1g). This suggests that conditions in the sigmoid  
186 colon may favour the generation of plasma cells rather than memory B cells from  
187 germinal centre responses in this region, or that the tissue contains more plasma cell  
188 niches.

189

### 190 **T helper cells disseminate through the colon and adopt region-specific** 191 **transcriptional profiles**

192 We next investigated CD4<sup>+</sup> T effector cells across the colon. Correlation analysis of  
193 Th1 and Th17 cells between different colon tissues revealed high transcriptional  
194 similarity between these effector cell subtypes (Figure 2a), with mLN versus  
195 peripheral tissue signature accounting for the greatest amount of variability  
196 (Spearman's corr = 0.88). Within the effector T cells of the colon, transverse colon  
197 and caecum cells cluster by T helper subtype. Surprisingly, Th1 and Th17 cells of  
198 the sigmoid colon did not cluster with their respective effector subtypes from other  
199 regions. Differential gene expression analysis between the effector cells in the  
200 sigmoid colon versus those in caecum and transverse colon revealed higher

201 expression of activation-related molecules including *TANK* (TRAF family member  
202 associated NF- $\kappa$ B activator) (adjusted  $P < 10^{-10}$ ), *CD83* (adjusted  $P < 10^{-10}$ ) and  
203 *PIM3* (adjusted  $P < 10^{-8}$ ) (Figure 2b). Expression of *CCL20*, encoding the ligand for  
204 CCR6 that is expressed by epithelial and myeloid cells more highly in small  
205 intestines than colon<sup>21</sup>, was also slightly increased by T helper cells of the proximal  
206 colon (Figure 2b), although this is likely due to higher abundance of *CCL20*<sup>+</sup> Th17  
207 cells at this site (Figure 1f & Supp Figure 2a). Conversely, sigmoid colon effector T  
208 cells showed higher expression of *KLF2* (adjusted  $P < 10^{-14}$ ) (Figure 2b) that  
209 encodes a transcriptional factor that transactivates the promoter for Sphingosine-1-  
210 phosphate receptor 1 (S1PR1) and is critical for T cell recirculation through  
211 peripheral lymphoid tissue<sup>22</sup>, *LMNA* (adjusted  $P < 10^{-47}$ ) that is reported to promote  
212 Th1 differentiation<sup>23</sup> and *EEF1G* (adjusted  $P < 10^{-13}$ ), a driver of protein synthesis<sup>24</sup>.  
213  
214 Next, we looked into the clonal relationships between T helper cells. We performed  
215 plate-based Smartseq2 on TCR $\alpha/\beta$ <sup>+</sup> FACS-sorted cells from colon regions and mLN  
216 of a sixth donor to capture paired gene expression and TCR sequences from  
217 individual T cells. Clonal groups were shared between Th1 and Th17 subtypes,  
218 supporting the notion that effector fate of CD4<sup>+</sup> T cells is determined after their initial  
219 activation<sup>25</sup>. Additionally, clonal expansion was observed by Th1 cells of the sigmoid  
220 colon (Figure 2C), in line with greater abundance in this tissue. Likewise, clonal  
221 expansion of Th17 cells was greatest in the caecum matching accumulation seen  
222 with the droplet-based scRNA-seq analysis. Several Th1 and Th17 clonal sisters  
223 were shared between clonal sites (Figure 2C), evidence that Th clones disseminate  
224 to distant regions of the colon.

225

226 Together these data demonstrate region-specific transcriptional differences relating  
227 to activation and tissue migration in Th1 and Th17 cells of the proximal and sigmoid  
228 colon. Identification of clonal sharing between these colon regions supports the idea  
229 that these observed transcriptional differences are due to cell-extrinsic rather than  
230 intrinsic factors.

231

### 232 **Activation trajectory of colonic CD4<sup>+</sup> T regulatory cells**

233 Treg cells are known to play a role in balancing the immune activity of other CD4 T  
234 cell subsets. Documented Treg cell activation by *Clostridium spp.*<sup>10</sup> and previous  
235 descriptions of tissue-specific transcriptional profiles<sup>26</sup> inspired us to interrogate  
236 these cells in greater detail. Firstly, we noted that the relative proportion of Treg cells  
237 did not change significantly from proximal to distal colon (Figure 1f). We then  
238 investigated whether the transcriptional profiles of Tregs from different compartments  
239 indicated distinct activation states or functionalities.

240

241 As we previously observed in the mouse<sup>26</sup>, sub-clustering of Treg cells from the  
242 mLN revealed major populations of central Tregs and effector Tregs (Figure 3a)<sup>26</sup>.  
243 Central Tregs were defined by highest expression of *SELL*, while effector Tregs were  
244 characterised by genes associated with the TNFRSF-NF-κB pathway (*TNFRSF9* and  
245 *TNF*) (Supp Figure 3a). In addition, we observed a population, previously termed  
246 non-lymphoid tissue-like Tregs (NLT-like Treg). These have characteristics of non-  
247 lymphoid tissue Treg cells, including high expression of *FOXP3*, *PRDM1*, *RORA*,  
248 *IL2RG*, *IL2RA* and *CTLA4* (Figure 3a & Supp Figure 3a). A fourth population, termed  
249 Treg-like cells, lacked the conventional markers of Treg cells - *FOXP3* and *IL2RA* -  
250 but clustered more closely with Treg cells than conventional T cells (Figure 3a and

251 Supp Figure 3a). These expressed the highest levels of *PDCD1* (gene encoding PD-  
252 1) among Treg populations and, uniquely, the transmembrane protein *MS4A6A*  
253 (Supp Figure 3a). This population of Treg-like cells could represent a Treg  
254 population that transiently loses FOXP3 expression <sup>27</sup>.

255

256 In the colon, Tregs clustered into three populations as previously described in mouse  
257 (Figure 3a) <sup>26</sup>. KLRB1<sup>+</sup> (also known as CD161) Treg cells were characterised by  
258 expression of *LAG3*, *IL2RA*, *CTLA4*, *KLRB1*, *ICOS* and *FOXP3* (Supp Figure 3a)  
259 suggesting a robust regulatory function, analogous to the peripherally-derived  
260 induced Treg cells described in mouse <sup>28</sup> and similar to CD161<sup>+</sup> Tregs described in  
261 human colon tissue <sup>20,29</sup>. Non-lymphoid tissue Treg (NLT Treg) cells express *IKZF2*,  
262 *GATA3* and *DUSP4* (Supp Figure 3a) consistent with the profile of thymic-derived  
263 Tregs <sup>30</sup>. The third population exhibited a profile reminiscent of lymphoid tissue Tregs  
264 with expression of *SELL*, *CCR7*, *TCR7*, *CXCR5* and *RGS2*, and were termed  
265 Lymphoid Tissue-like Treg (LT-like Treg) cells (Supp Figure 3a). LT-like Treg cells  
266 are likely newly arrived in the colon tissue from mLN. A small number of *Ki67*<sup>+</sup> Treg  
267 cells were also identified in the colon and mLN (Figure 3a & Supp Table 3). The  
268 proportions of these subsets varied by donor, but were mostly consistent between  
269 colon regions (Figure 3b).

270

271 The presence of NLT-like Treg cells in the mLN and LT-like Treg cells in the colon,  
272 both with profiles suggesting migration, led us to recreate this migration pathway *in*  
273 *silico*. We ordered all Tregs along “pseudo-space” using Monocle2. This gave rise to  
274 a smooth pseudo-space trajectory from resting central Tregs in the mLN to highly  
275 suppressive Tregs in the colon (Figure 3c). As seen in the mouse <sup>26</sup>, NLT-like Tregs

276 and LT-like Tregs blended in the middle of the trajectory, in accordance with these  
277 cells representing transitioning and migratory populations between lymphoid and  
278 peripheral tissues. In order to understand which gene signatures drive the migration  
279 and tissue adaptation of Tregs in human tissues, we determined the genes changing  
280 along the previously calculated 'pseudo-space' (Figure 3c). Genes expressed at the  
281 beginning of pseudo-space included *SELL*, *CCR7* and *CXCR4*, permitting entry into  
282 lymph nodes (Figure 3c). At the end of pseudo-space, the most highly expressed  
283 genes were *FOXP3*, *IL2RA*, *CTLA4*, *IL10* and *LAG3*. These largely suppressive  
284 genes were co-expressed with TNF receptors (*TNFRSF4*, *TNFRSF14*, *TNFRSF18*,  
285 *TNFRSF1B*) indicating a reliance on the TNFRSF-NF- $\kappa$ B axis. Chemokine receptors  
286 *CXCR3*, *CXCR6*, *CCR6* and *CCR4* were also expressed by Tregs cells in the  
287 periphery, matching previous reports of Th1/Th17-like Tregs cells in the colon  
288 (Figure 3c)<sup>26</sup>.

289

290 Together, these results highlight heterogeneity in Treg cell states in mLN and colon,  
291 and reveal a possible Foxp3-transiently absent population. We also infer a  
292 continuous activation trajectory of these Treg cell states between draining lymph  
293 nodes and colon, and highlight genes regulating Treg cell migration between tissues  
294 and their adoption of Th-like profiles.

295

### 296 **B cells display a proximal-to-distal activation gradient**

297 Following from our observations in CD4<sup>+</sup> T cells across the colon, we next focused  
298 on humoral responses by performing a more in-depth analysis of B cells in different  
299 colon regions. We compared transcriptional profiles of plasma cells between different  
300 colonic regions. This analysis revealed *CCL3* and *CCL4* as highly enriched in caecal

301 plasma cells (log fold change of 0.61 and 0.70 and adjusted P <10<sup>-28</sup> and <10<sup>-9</sup>  
302 respectively) (Figure 4a). These chemokines are secreted by B cells in response to  
303 BCR activation<sup>31</sup> and result in the migration of CCR5-expressing cells such as T  
304 cells<sup>32,33</sup> and monocytes<sup>34</sup> to the tissue microenvironment. This suggests that BCR  
305 cross-linking and signalling may be more prominent in the proximal colon. Caecal  
306 plasma B cells were also enriched for *CXCR4* (log fold change of 0.44, adjusted P <  
307 10<sup>-10</sup>) (Figure 4a), a chemokine receptor highly expressed by germinal centre (GC) B  
308 cells and important for the movement of plasmablasts to the GC-T zone interface  
309 post-GC responses<sup>35</sup>.

310

311 Amongst the genes more highly expressed by plasma cells in the sigmoid colon was  
312 *CD27* (Figure 4a; log fold change of 0.24; adjusted P <10<sup>-40</sup>), a member of the TNF  
313 receptor family that is expressed by memory B cells and even more highly by plasma  
314 cells<sup>36</sup>. We confirmed differential expression of CD27 at the protein level and  
315 additionally observed a proximal-to-distal gradient of increasing CD27 expression by  
316 plasma cells in the colon (Figure 4b). Targeted homing of B cells from their site of  
317 activation in lymphoid tissues to the colonic lamina propria relies on signalling  
318 through CCR10 and its cognate ligand, CCL28, and integrin  $\alpha 4\beta 7$ <sup>37,38,39</sup>. *CCR10* (log  
319 fold change of 0.24; adjusted P < 10<sup>-16</sup>), *ITGA4* (log fold change of 0.58; adjusted P  
320 < 10<sup>-24</sup>) and *ITGB4* (log fold change 0.57; adjusted P < 10<sup>-108</sup>) were also more highly  
321 expressed by sigmoid colon IgA<sup>+</sup> plasma cells (Figure 4a).

322

323 To determine whether the B cell clonal repertoire changes across the colon, we took  
324 advantage of the paired single-cell VDJ-sequencing data available from two donors  
325 for which scRNA-seq libraries were generated using 10x Genomics 5' chemistry. We

326 confirmed the expression of IgM and IgD isotypes by follicular B cells, IgG1 and IgG2  
327 by IgG<sup>+</sup> plasma cells, IgA1 and IgM expression by memory cells in the mLN and  
328 predominantly IgA2 expression by plasma cells of the colon (Figure 4c). The  
329 mutation frequency of the heavy chain variable region was greatest in the plasma  
330 cells followed by memory B cells, indicating more somatic hypermutation by these  
331 cell types compared to the naive follicular B cells (Figure 4d). Additionally, while  
332 mutational frequency was consistent across colon regions and mLN for memory and  
333 follicular B cells, it was significantly increased in IgA<sup>+</sup> plasma cell of the sigmoid  
334 colon compared to the other colon regions (Figure 4e). IgG<sup>+</sup> plasma cells also  
335 showed a trend towards increased mutational frequency in the sigmoid colon,  
336 however their numbers were limiting (Figure 4e).

337

338 We then identified clonally-related B cells and plasma cells examine clonal  
339 expansion dynamics of different cellular populations throughout the gut. Clonal  
340 expansion was evident in memory B cells, IgA<sup>+</sup> plasma cells and IgG<sup>+</sup> plasma cells  
341 (Figure 4f). While the relative abundance of clonal groups did not differ across the  
342 colon regions of memory B cells and IgG<sup>+</sup> plasma cells, again this was greatest for  
343 IgA<sup>+</sup> plasma cells in the sigmoid colon (Figure 4f). This was supported by  
344 bootstrapped VDJ sequence diversity analysis of clonally-related IgA<sup>+</sup> plasma cells,  
345 which showed that the diversity of BCR sequences was consistent between donors  
346 and that there was a trend for decreased diversity (consistent with higher rates of  
347 clonal expansion) of IgA<sup>+</sup> plasma cells in the sigmoid colon (Supp Figure 4a & 4b).  
348 While some clones were shared between B cell types (i.e. memory and IgA<sup>+</sup>  
349 plasma), indicating that alternate B cell fates can derive from a single precursor cell,  
350 most expanded clones within the gut were of the same cell type (Supp Figure 4c).

351 Finally, we found many examples of B cell clones shared between all three colonic  
352 regions, and to a lesser extent the mLN, for both donors (Figure 4g), indicating  
353 dissemination of B cells throughout the colon as previously reported<sup>40</sup>. Our  
354 observation of B cell dissemination throughout the colon was replicated with bulk  
355 BCR sequencing from whole tissue (Figure 4h)<sup>41</sup>. Interestingly, increased clonal  
356 variability of sigmoid colon B cells was reflected in a greater spread of BCR variable  
357 chains expressed compared with caecum and transverse colon (Supp. Figure 4d),  
358 altogether suggesting a more active response in the distal versus proximal colon.

359

360 These data indicate a highly activated state of plasma cells in the distal colon  
361 compared with proximal colon plasma cells, characterised by greater accumulation,  
362 somatic hypermutation, clonal expansion and stronger homing to the colon mucosa.

363

#### 364 **IgA is more responsive to specific bacterial species in the sigmoid colon**

365 Reports by Macpherson et al. have shown that IgA is secreted by plasma cells in  
366 response to the presence of specific bacteria species, rather than as a general  
367 response to the microbiome<sup>42</sup>. In light of this, we wondered whether the increased  
368 plasma cell activation we observed in the sigmoid colon was linked to the differences  
369 in reactive bacteria species. To this end, we assessed IgA-opsonisation of bacteria  
370 from the donor microbiome samples (Figure 5a). Surprisingly, a greater proportion of  
371 bacteria from the sigmoid colon was positive for IgA-binding compared with bacteria  
372 of the caecum and transverse colon (Figure 5b). Furthermore, shotgun sequencing  
373 of IgA-opsonised bacteria revealed a richer community of species in the sigmoid  
374 colon (Figure 5c & Supp Table 5). Interestingly, diversity of IgA-bound bacteria,



375 which considers relative abundance of each species, was lower in the sigmoid colon  
376 compared to caecum (Figure 5d).

377

378 These data suggest that, compared with the caecum, IgA<sup>+</sup> plasma cells of the  
379 sigmoid colon respond to a rich and unevenly represented community of bacterial  
380 species, likely contributing to their increased activation status, strong homing to the  
381 colon and trend towards greater clonal diversity (Figure 5e).

382

383

## 384 **Discussion**

385 In this study we performed the first simultaneous assessment of the colonic mucosal  
386 microbiome and immune cells in human donors at steady-state. This enabled us to  
387 compare lymphoid and peripheral tissue immunity and explore how immune cells  
388 and their neighbouring microbiome change along the colon within the same  
389 individuals. In doing so, we highlight previously unappreciated regional differences in  
390 both cellular communities. Our unique annotated colon immune single-cell dataset is  
391 available at [www.gutcellatlas.org](http://www.gutcellatlas.org), where users can visualise their genes of interest.

392

393 We describe a shift in the balance of T helper subsets, with a predominance of Th17  
394 in the caecum and Th1 in the sigmoid colon. Decreasing abundance of Th17 cells  
395 has similarly been shown from proximal small intestine to colon of mice <sup>7</sup>.

396 Additionally, simultaneous increase of the genus *Bacteroides* and Th1 numbers in  
397 the sigmoid colon are in line with findings that polysaccharide from *Bacteroides*  
398 *fragilis* preferentially induces Th1 differentiation in the intestine of germ-free mice <sup>11</sup>.

399 An alternative or complementary explanation for skewed T helper proportions and  
400 variation in transcriptional profiles is offered in a study by Harbour et al., which  
401 demonstrated that Th17 cells can give rise to a IFN $\gamma$ <sup>+</sup> 'Th1-like' cell in response to IL-  
402 23 production by innate cells <sup>43</sup>. These findings demonstrate the complexity of  
403 external signals shaping colonic Th responses leading to regional changes in their  
404 numbers and differentiation.

405

406 In contrast to conventional T cells, Treg cells are evenly represented across the  
407 colon. Treg cell subpopulations within the mLN and colon tissue are analogous to  
408 those we have recently described in mouse <sup>26</sup>. We also identify an additional

409 population, termed Treg-like cells, reminiscent of a CD25<sup>+</sup>FOXP3<sup>lo</sup>PD1<sup>hi</sup> Treg  
410 population in the peripheral blood, although the latter was described to also express  
411 Ki67<sup>44</sup>. This population could represent uncommitted Treg cells experiencing  
412 transient loss of FOXP3 while retaining regulatory potential<sup>27</sup> or permanent loss  
413 FOXP3 and adoption of a more pro-inflammatory phenotype after repeated  
414 stimulation<sup>45</sup>. Our pseudo-space analysis of Treg cells suggests a continuum of  
415 activation states from resting cells in the lymphoid tissue through to highly  
416 suppressive cells in the periphery. We identify genes underlying this transition  
417 including chemokine receptors that are strongly expressed on arrival in the intestine  
418 that enable interaction with, and suppression of, Th1 and Th17 cells<sup>46</sup>. Similarly to  
419 mouse, pseudospace from lymphoid to peripheral tissue correlates with  
420 transcriptional markers of migratory potential and suppression of effector cells.  
421  
422 We find that IgA<sup>+</sup> plasma cells are more abundant and have greater expression of  
423 colon-specific migration markers (*CCR10*, *ITGA4* and *ITGB7*) in the sigmoid colon  
424 compared to the proximal colon. This adds finer resolution to previous reports  
425 describing increasing abundance of IgA<sup>+</sup> plasma cells from the small intestine to the  
426 colon<sup>47</sup>. Our B cell repertoire analysis demonstrates extensive clonal expansion  
427 within each colon region and to a lesser extent between regions, arguing for colonic  
428 dissemination of B cells from the same precursor pool, followed by local expansion.  
429 Furthermore, more clonal sharing existed between regions of the colon than with  
430 mLN, consistent with recent work showing that while mLN clones can also be  
431 detected in blood, the intestines are host to a unique B cell clonal network<sup>48</sup>.  
432 Sigmoid colon plasma cells, in particular, exhibit greater mutational abundance and  
433 clonal expansion. Previous work has shown the mutational frequency of B cells is

434 consistently high between duodenum and colon and are primarily driven by dietary  
435 and microbiome antigens respectively <sup>49</sup>. Thus, we suggest that enhanced plasma  
436 cell accumulation, mutation and expansion in the sigmoid colon is in response to  
437 continued stimulation from the local microbiome. This may happen through  
438 increased engagement of sigmoid colon plasma cells in T cell-mediated germinal  
439 centre reactions in gut-associated lymphoid structures or in T cell-independent  
440 somatic hypermutation in local isolated lymphoid follicles <sup>50</sup> followed by local  
441 expansion. Yet the exact mechanisms require further study.

442

443 Finally, we show greater IgA binding to the microbiome in the sigmoid colon  
444 compared to proximal sites (Figure 5b). One possible explanation for this  
445 observation is the accumulation of upstream secreted IgA and IgA-bound bacteria in  
446 the sigmoid colon. However, our simultaneous observation of enhanced plasma cell  
447 responses in the sigmoid colon suggests that IgA is locally produced as a result of  
448 immune poising. Possible scenarios contributing to a richer immune-reactive  
449 microbiome in the sigmoid colon are bacteria derived externally via the rectum.  
450 Alternatively, environmental pressures (i.e. lower water and nutrient levels <sup>4</sup>) could  
451 restrict outgrowth of dominant gastrointestinal species of the proximal colon,  
452 providing space for smaller communities of opportunistic species. The IgA response  
453 in the colon is antigen-specific rather than a general response to the presence of  
454 bacteria <sup>51,42</sup>. Thus, the overall increased number of unique species recognised by  
455 host IgA antibodies in the sigmoid colon is fitting with the enhanced clonal expansion  
456 and mutation of plasma cells at this site.

457

458 Together, our simultaneous analyses of microbiome and neighbouring immune cells  
459 highlight the significance of environmental signals in shaping and maintaining  
460 regional adaptive immune cell composition and function in the intestine at steady-  
461 state. Dysregulation of T helper cells<sup>52</sup> and plasma cells<sup>53,54,55</sup> has been implicated  
462 in susceptibility to inflammatory bowel disease. Observations of the linked  
463 compartmentalisation of these immune cells and microbial species along the colon at  
464 steady-state may provide a platform for understanding the mechanisms underpinning  
465 the tropism of different intestinal diseases to specific regions of the gut, such as  
466 Crohn's disease and ulcerative colitis.

467

468

469

470

471

## 472 **Acknowledgements**

473 The authors gratefully acknowledge the support received from the Sanger Single  
474 Flow Cytometry Facility, Sanger Cellular Genetics Department IT team and Core  
475 Sanger Sequencing pipeline. We thank Dr Foad Rouhani and Tomas Castro-Dopico  
476 for insightful discussions about project design and experimental design and Dr  
477 Krishnaa Mahbubani for help with collection of human tissue. We acknowledge Jana  
478 Eliasova for graphical images. This research was supported by funding from  
479 Wellcome (grant no. WT206194) and European Research Council (grant no.  
480 646794). K. R. J. receives financial support from Christ's College, University of  
481 Cambridge. T. G. was funded by the European Union's H2020 research and  
482 innovation programme "ENLIGHT-TEN" under the Marie Skłodowska-Curie grant  
483 agreement 675395. H. W. K. was funded by a Sir Henry Wellcome PostDoctoral  
484 Fellowship (grant no. 213555/Z/18/Z). B. R. B. was funded by the NIHR Cambridge  
485 Biomedical Research Centre. We are grateful to the deceased organ donors, donor  
486 families and the Cambridge Biorepository for Translational Medicine for access to  
487 the tissue samples. This publication is part of the Human Cell Atlas -  
488 [www.humancellatlas.org/publications](http://www.humancellatlas.org/publications).

489

## 490 **Author contributions**

491 K. R. J. initiated this project, designed and performed scRNA-seq and microbiome  
492 experiments, analysed data and wrote the manuscript. T. G. analysed bulk BCR-seq  
493 data and contributed extensively to scRNA-seq data analysis. R. E. contributed to  
494 data interpretation and data analysis. N. K. and E. L. G. analysed 16S ribosomal  
495 sequencing and metagenomics data. M. D. S assisted in microbiome related  
496 experiments. H. W. K. and L. K. J. analysed the 10x Genomics VDJ datasets and

497 contributed to generation of figures. B. R. B. and K. S. P. carried out tissue  
498 collection. J. R. F. designed FACS sorting panel and assisted in FACS sorting. V. P.  
499 assisted in bulk BCR library preparation and analysis. L. B. J., O. S., S. H. and J. L.  
500 J. dissociated tissues from donor 390c. K. S. P. carried out scRNA-seq read  
501 alignment and quality control. S. C. F., K. B. M. and M. R. C. designed experiments  
502 and interpreted data. T. D. L. and S. A. T. initiated and supervised the project and  
503 interpreted data. All authors edited the paper.

504

505 **Competing interests**

506 S.C.F. and T.D.L. are either employees of, or consultants to, Microbiotica Pty Ltd.

507 **Methods:**

508 **Colon and mesenteric lymph node tissue retrieval**

509 Human tissue was obtained from deceased transplant organ donors after ethical  
510 approval (reference 15/EE/0152, East of England Cambridge South Research Ethics  
511 Committee) and informed consent from the donor family. Fresh mucosal tissue from  
512 the caecum, transverse colon and sigmoid colon, and lymph nodes from the intestine  
513 mesentery, were excised within 60 minutes of circulatory arrest and colon tissue  
514 preserved in University of Wisconsin (UW) organ preservation solution (Belzer UW®  
515 Cold Storage Solution, Bridge to Life, USA) and mLN stored in saline at 4°C until  
516 processing. Tissue dissociation was conducted within 2 hours of tissue retrieval.  
517 Four individuals (287c, 296b, 403c and 411c) had received antibiotics in the two  
518 weeks prior to death (Supp. Table 1).

519

520 **Tissue dissociation for FACS separation and MAC separation**

521 Tissue pieces from donors 290b, 298c, 302c, 364b and 411c were manually diced  
522 and transferred into 5mM EDTA (Thermo Fisher Scientific)/1mM DTT/10mM HEPES  
523 (Thermo Fisher Scientific)/2% FBS in RPMI and incubated in a shaker (~200rpm) for  
524 20 minutes at 37°C. Samples were briefly vortexed before the media renewed and  
525 incubation repeated. Tissue pieces were washed with 10mM HEPES in PBS and  
526 transferred into 0.42mg/ml Liberase DT (Roche)/0.125 KU DNase1 (Sigma)/10mM  
527 HEPES in RPMI and incubation for 30 minutes at 37°C. The digested samples were  
528 passed through a 40um strainer and washed through with FBS/PBS.

529

530 **Fluorescence-activated cell sorting**



531 Cells from donor 290b, 298c and 302c were pelleted and resuspended in 40%  
532 Percoll (GE Healthcare). This was underlayered with 80% Percoll and centrifuged at  
533 600g for 20 minutes with minimal acceleration and break. Cells at the interface were  
534 collected and washed with PBS. Cells were stained for fluorescent cytometry using  
535 Zombie Aqua Fixable Viability Dye (Biolegend), CD45-BV605 (clone HI30;  
536 Biolegend), CD3-FITC (clone OKT3; Biolegend), CD4-BV421 (clone SK3;  
537 Biolegend), CD8-PE-Cy7 (clone SK1; Biolegend), CD19-APC-Cy7 (clone HIB19;  
538 Biolegend), IgD-PE Dazzle (clone IA6-2; Biolegend), CD27-BV711 (clone M-T271;  
539 Biolegend), HLA-DR- BV785 (clone L243; Biolegend), CD14-APC (clone 63D3;  
540 Biolegend) and CD11c-PE (clone 3.9; eBioscience). Non-CD4<sup>+</sup> T immune cells were  
541 sorted as live singlet CD45<sup>+</sup>, CD3<sup>-</sup> and CD4<sup>-</sup>. CD4<sup>+</sup> T cells were sorted as live singlet  
542 CD45<sup>+</sup>, CD3<sup>+</sup> and CD4<sup>+</sup>. Each fraction was manually counted using 0.4% Trypan  
543 Blue (gibco) and a haemocytometer and diluted to 500 cells/ul in PBS. Sorting was  
544 carried out on a BD FACS ARIA Fusion. Analysis of FACS data was conducted with  
545 FlowJo Software package.

546

#### 547 **MACS cell enrichment**

548 Cells from donor 411c were pelleted for 5mins at 300g and resuspended in 80ul of  
549 ice-cold MACS buffer (0.5% BSA (Sigma-Aldrich Co. Ltd), 2mM EDTA  
550 (ThermoFisher) in DPBS (Gibco)) and 20ul of CD45 Microbeads (Miltenyi Biotech).  
551 Cells were incubated for 15 minutes at 4°C before being washed with 2ml of MACS  
552 buffer and centrifuged as above. Cells were resuspended in 500ul of MACS buffer  
553 and passed through a pre-wetted MS column on QuadroMACS magnetic cell  
554 separator (Miltenyi). The column was washed 4 times with 500ul of MACS buffer,  
555 allowing the full volume of each wash to pass through the column before the next

556 wash. The column was removed from the magnet and the cells eluted with force with  
557 1ml of MACS buffer into a 15ml tube. Cells were pelleted as above and cell number  
558 and viability were determined using a NucleoCounter NC-200 and Via1-Cassette  
559 (ChemoMetec). Cells were resuspended at 500 cells/ul in 0.04% BSA in PBS.

560

#### 561 **Tissue dissociation for Ficoll separation**

562 Tissues from donor 390c were manually diced and <5.0g was added per Miltenyi C  
563 tube with 5mL tissue dissociation media (1x Liberase TL (0.13U/mL/DNase; Roche)  
564 and Benzonase nuclease (10U/mL; Merck) in 1% FCS and 20mM HEPES in PBS  
565 (Lonza). Samples were dissociated with GentleMACS Octo for 30 minutes  
566 homogenising/37°C cycle. Enzymatic digestion was stopped with the addition of  
567 2mM EDTA in tissue dissociation media. Digested samples were then passed  
568 through a 70uM smart strainer (Miltenyi) before being washed with PBS and pelleted  
569 at 500g for 10 minutes. Cells were resuspended in PBS, layered onto FicollPaque  
570 Plus (GE Healthcare) and spun at RT 400g for 25 minutes. Mononuclear cells were  
571 retrieved from Ficoll layer and washed with PBS. Cells were filtered through 0.2uM  
572 filter (FLOwmi cell strainers, BelArt). Cells were manually counted using a  
573 haemocytometer and diluted to a concentration of 1000 cells/μl in 0.04% BSA in  
574 PBS.

575

#### 576 **10x Genomics Chromium GEX library preparation and sequencing**

577 Cells were loaded according to the manufacturer's protocol for Chromium single cell  
578 3' kit (version 2) or 5' gene expression (version 2) in order to attain between 2000-  
579 5000 cells/well. Library preparation was carried out according to the manufacturer's  
580 protocol. For samples from donors 290b, 298c and 302c, eight 10x Genomics

581 Chromium 3' libraries were pooled sequenced on eight lanes of an Illumina HiSeq  
582 4000. For samples from donors 390c and 417c, sixteen 10x Genomics Chromium 5'  
583 libraries were pooled and sequenced on 2 lanes of a S2 flowcell of Illumina Novaseq  
584 with 50bp paired end reads.

585

#### 586 **10x Genomics Chromium VDJ library preparation and sequencing**

587 10x Genomics VDJ libraries were generated from the 5' 10x Genomics Chromium  
588 cDNA libraries as detailed in the manufacturer's protocol. BCR libraries for each  
589 sample were pooled and sequenced on a single lane of Illumina HiSeq 4000 with  
590 150bp paired end reads.

591

#### 592 **Plate-based scRNA-seq**

593 Plate based scRNA-seq was performed with the NEBNext Single Cell/Low Input  
594 RNA Library Prep Kit for Illumina (New England Biolabs Inc, E6420L). Cells from  
595 donor 364b were snap frozen in 10% DMSO in 90% BSA. Cells were thawed rapidly  
596 in a 37°C water bath and diluted slowly with pre-warmed 2% FBS in D-PBS. Cells  
597 were pelleted for 5 minutes at 300g and washed with 500ul of DPBS and pelleted as  
598 before. Cells were resuspended in 200ul of CD25-PE (clone M-A251, Biolegend),  
599 CD127-FITC (clone EBIORDR5, eBioscience), CD4-BV421 (clone SK3, Biolegend)  
600 and TCR $\alpha$ / $\beta$ -APC (clone 1p26, Biolegend) (all diluted 1:200) and Zombie Aqua  
601 Fixable Viability Dye (Biolegend) (diluted 1:1000) and incubated for 30 minutes in the  
602 dark at room temperature. Cells were washed twice with 500ul of 2% FBS in D-PBS  
603 before being filtered through a 100uM filter. Single, live, TCR $\beta$ + cells were FACS  
604 sorted into a pre-prepared 384-well plate (Eppendorf, Cat. No. 0030128508)  
605 containing 2  $\mu$ l of 1X NEBNext Cell Lysis Buffer. FACS sorting was performed with a

606 BD Influx sorter with the indexing setting enabled. Plates were sealed and spun at  
607 100 x g for 1 minute then immediately frozen on dry ice and stored at -80 °C.  
608  
609 cDNA generation was then performed in an automated manner on the Agilent Bravo  
610 NGS workstation (Agilent Technologies). Briefly, 1.6 µl of Single Cell RT Primer Mix  
611 was added to each well and annealed on a PCR machine (MJ Research Peltier  
612 Thermal Cycler) at 70°C for 5 minutes. 4.4 µl of Reverse Transcription (RT) mix was  
613 added to the mixture and further incubated at 42°C for 90 minutes followed by 70°C  
614 for 10 minutes to generate cDNA. 22 µl of cDNA amplification mix containing  
615 NEBNext Single Cell cDNA PCR MasterMix and PCR primer was mixed with the  
616 cDNA, sealed and spun at 100 x g for 1 minute. cDNA amplification was then  
617 performed on a PCR machine (MJ Research Peltier Thermal Cycler) with 98°C 45 s,  
618 20 cycles of [98°C 10 s, 62°C 15 s, 72°C 3 mins], 72°C 5 mins. The 384-well plate  
619 containing the amplified cDNA was purified with an AMPure XP workflow (Beckman  
620 Coulter, Cat No. A63880) and quantified with the Accuclear Ultra High Sensitivity  
621 dsDNA kit (Biotium, Cat. No. 31028). ~10 ng of cDNA was stamped into a fresh 384-  
622 well plate (Eppendorf, Cat. No. 0030128508) for sequencing library preparation.  
623  
624 Sequencing libraries were then generated on the Agilent Bravo NGS workstation  
625 (Agilent Technologies). Purified cDNA was fragmented by the addition of 0.8 µl of  
626 NEBNext Ultra II FS Enzyme Mix and 2.8 µl of NEBNext Ultra II FS Reaction buffer  
627 to each well and incubated on a PCR machine (MJ Research Peltier Thermal Cycler)  
628 for 72°C at 15 minutes and 65°C for 30 minutes. A ligation mixture was then  
629 prepared containing NEBNext Ultra II Ligation Master Mix, NEBNext Ligation  
630 Enhancer and 100 µM Illumina compatible adapters (Integrated DNA Technologies)

631 and 13.4  $\mu$ l added to each well of the 384-well plate. The ligation reaction was  
632 incubated on the Agilent workstation at 20°C for 15 minutes and then purified and  
633 size selected with an AMPure XP workflow (Beckman Coulter, Cat No. A63880). 20  
634  $\mu$ l of KAPA HiFi HS Ready Mix (Kapa Biosystems, Cat. No. 07958927001) was then  
635 added to a pre-prepared 384-well plate (Eppendorf, Cat. No. 0030128508)  
636 containing 100  $\mu$ M i5 and i7 indexing primer mix (50  $\mu$ M each) (Integrated DNA  
637 Technologies). The indexing primers pairs were unique to allow multiplexing of up to  
638 384 single cells in one sequencing pool. The plate containing the PCR Master Mix  
639 and indexing primers was stamped onto the adapter ligated purified cDNA, sealed  
640 and spun at 100 x g for 1 minute. Amplification was performed on a PCR machine  
641 (MJ Research Peltier Thermal Cycler) with 95°C for 5 minutes, 8 cycles of [98°C 30  
642 seconds, 65°C 30 seconds, 72°C 1 minute], 72°C 5 minutes. The PCR products  
643 were pooled in equal volume on the Microlab STAR automated liquid handler  
644 (Hamilton Robotics) and the pool purified and size selected with an AMPure XP  
645 workflow (Beckman Coulter, Cat No. A63880). The purified pool was quantified on  
646 an Agilent Bioanalyser (Agilent Technologies) and sequenced on one lane of an  
647 Illumina HiSeq 4000 instrument.

648

#### 649 **Single-cell RNA sequencing data alignment**

650 10x Genomics gene expression raw sequencing data was processed using  
651 CellRanger software version 3.0.2 and 10X human genome GRCh38-3.0.0 as the  
652 reference. 10x Genomics VDJ immunoglobulin heavy and light chain were  
653 processed using cellranger vdj (version 3.1.0) and the reference cellranger-  
654 GRCh38-alts-ensembl-3.1.0 with default settings. NEB sequencing data was

655 processed using STAR 2.5.1b into HTSeq and mapped to 10X human genome  
656 GRCh38-1.2.0.

657

### 658 **Single-cell RNA sequencing quality control**

659 Single cell read counts from all samples were pooled and filtered considering  
660 number of UMIs - keeping genes expressed in minimum of 3 cells, keeping cells  
661 where genes detected are in a range 700-6000. Non-immune cells were excluded  
662 from the final analysis based on the absence of PTPRC and presence of markers  
663 such as EPCAM (epithelial cells) and COL1A1 (fibroblasts).

664

### 665 **Cell type annotation**

666 Cells were clustered using Scanpy (version 1.4) processing pipeline<sup>56</sup>. In short, the  
667 counts were normalised to 10,000 reads per cell (sc.pp.normalise\_per\_cell) and log  
668 transformed (sc.pp.log1p) to be comparable amongst the cells. The number of UMIs  
669 and percentage of mitochondrial genes were regressed out (sc.pp.regress\_out) and  
670 genes were scaled (sc.pp.scale) to unit variance. The normalised counts were used  
671 to detect highly variable genes (sc.pp.highly\_variable\_genes). Batch correction  
672 between the donors was performed using bbknn method<sup>57</sup> on 50 PCs and trim  
673 parameter set to 100. Clusters were then identified using Leiden graph-based  
674 clustering (resolution set to 1). Cell identity was assigned using known markers  
675 shown in Figure 1E and the top differentially expressed genes identified using  
676 Wilcoxon rank-sum test (sc.tl.rank\_genes\_groups function, Supplementary Table 4).  
677 CD4 T cells, myeloid cells, B cells were subclustered for identification of subsets  
678 within each cluster. Treg cells annotated above were further subclustered using the  
679 “FindClusters” and “RunUMAP” functions from Seurat (Version 3.0.1)<sup>58</sup> (Figure 3).

680 The number of PCs used for Treg cell clustering were estimated by the elbow of a  
681 PCA screen plot, in combination to manual exploration of the top genes from each  
682 PC. Clustering of mLN Treg cells was performed using 1-14 PCs and resolution of  
683 0.3 and colonic Treg cells with 1-11 PCs and resolution of 0.3.

#### 684 **'Pseudospace' analysis**

685 'Pseudospace' analysis of Treg cells was performed using Monocle 2.2.0<sup>59</sup>. Data  
686 was log normalised and cell ordered based on DDRTree reduction on highly variable  
687 genes with donor effect regression. The heatmap in Figure 3c was generated using  
688 the "plot\_pseudotime\_heatmap" function in Monocle 2.2.0<sup>59</sup>. Genes contributing to  
689 'pseudospace' were first filtered for exclusion of mitochondria and immunoglobulin  
690 genes, expression in at least 15 cells and  $qval < 0.001$ . Gene expression was  
691 smoothed into 100 bins along pseudospace using a natural spline with 3 degrees of  
692 freedom. Matching column annotation for each bin was determined as the most  
693 prevalent tissue region origin of the cells within that bin. Genes were grouped into 2  
694 clusters and ordered by hierarchical clustering. Cells were ordered through  
695 pseudotime.

696

#### 697 **Sampling of microbiome**

698 Swabs were taken immediate of the mucosal surface of excised tissue using MWE  
699 Transwab Cary Blair (catalogue number: MW168). Swabs were maintained at 4°C.  
700 Working in a biosafety cabinet, swabs were washed in 500µl of anaerobic PBS and  
701 mixed with anaerobic 50% glycerol before being snap frozen on dry ice and stored at  
702 -80°C until use.

#### 703 **Microbiota profiling and sequencing**

704 The microbiota vials were defrosted on ice. Approximately 100µl of each was  
705 transferred into new Eppendorf tubes. DNA was extracted from microbiome samples  
706 using the MP Biomedical FastDNA SPIN Kit for soil (catalogue number 116560200).  
707 16S rRNA gene amplicon libraries were made by PCR amplification of variable  
708 regions 1 and 2 of the 16S rRNA gene using the Q5 High-Fidelity Polymerase Kit  
709 supplied by New England Biolabs as described in <sup>60</sup>. Primers 27F  
710 AATGATACGGCGACCACCGAGATCTACAC (first part, Illumina adaptor)  
711 TATGGTAATT (second part, forward primer pad) CC (third part, forward primer  
712 linker) AGMGTTYGATYMTGGCTCAG (fourth part, forward primer) and 338R  
713 CAAGCAGAAGACGGCATAACGAGAT (first part, reverse complement of 3' Illumina  
714 adaptor) ACGAGACTGATT (second part, golay barcode) AGTCAGTCAG (third part,  
715 reverse primer pad) AA (fourth part, reverse primer linker)  
716 GCTGCCTCCCGTAGGAGT (fifth part, reverse primer) were used. Four PCR  
717 amplification reactions per sample were carried out; products were pooled and  
718 combined in equimolar amounts for sequencing using the Illumina MiSeq platform,  
719 generating 150 bp reads. Analysis of partial 16S rRNA sequences was carried out  
720 using SILVA v132 and mothur MiSeq SOP<sup>61</sup>. The 16S rRNA gene alignments were  
721 used to determine a maximum likelihood phylogeny using Fasttree <sup>62</sup>. Phylogenetic  
722 trees were visualised and edited using iTOL<sup>63</sup>.

723

#### 724 **T cell clonal sharing analysis**

725 T cell receptor sequences generated using the Smartseq2 scRNA-seq protocol were  
726 reconstructed using the TraCeR software as previously described <sup>64</sup>.

727

#### 728 **Bulk B cell receptor sequencing**



729 Small portions of samples were taken from excised tissues and snap frozen in 1ml of  
730 RNAlater (Ambion). RNA extracted from tissue using the QIAshredder and QIAGEN  
731 Mini Kit (50). RNA concentration was measured using a Bioanalyser. B Cell  
732 Receptor (BCR) heavy chain sequences of all B lineage subsets present in the  
733 tissue were amplified as previously described<sup>41</sup>. Briefly, RNA was reverse  
734 transcribed using a barcoded reverse primer set capturing all antibody (sub)classes.  
735 Targeted heavy-chain amplification was performed with a multiplex set of IGHV gene  
736 primers to FR1 and a universal reverse primer using HiFi qPCR KAPA Biosystems.  
737 After adapter filtering and trimming, BCR sequences were assembled and aligned  
738 using MiXCR (version 65)<sup>65</sup>. It is worth noting that detected BCR sequences are  
739 biased towards those included in the reference database and while there is a  
740 continuous discovery of novel germline alleles, no database is currently a complete  
741 reflection of the human IGH locus diversity. Only in-frame and IGH sequences with  
742 at least 3 read counts were kept for the analysis. To calculate the CDR3 nucleotide  
743 shared repertoire, the tcR package was used<sup>66</sup>.

744

#### 745 **10x Genomics single-cell VDJ data processing, quality control and annotation**

746 Poor quality VDJ contigs that either did not map to immunoglobulin chains or were  
747 assigned incomplete by cellranger were discarded. For additional processing, all IgH  
748 sequence contigs per donor were combined together. We further filtered IgH contigs  
749 as to whether they had sufficient coverage of constant regions to ensure accurate  
750 isotype assignment between closely related subclasses using MaskPrimers.py  
751 (pRESTO version 0.5.10)<sup>67</sup>. IgH sequences were then further annotated using  
752 IgBlast<sup>68</sup> and reassigned isotype classes using AssignGenes.py (pRESTO) prior to  
753 correction of ambiguous V gene assignments using TIgGER (version .03.1)<sup>69</sup>.

754 Clonally-related IgH sequences were identified using DefineClones.py (ChangeO  
755 version 0.4.5)<sup>69</sup> with a nearest neighbour distance threshold of 0.2, as determined  
756 by visual inspection of the output of distToNearest (Shazam version 0.1.11)<sup>69</sup>.  
757 CreateGermlines.py (ChangeO version 0.4.5) was then used to infer germline  
758 sequences for each clonal family and observedMutations (Shazam version 0.1.11)  
759 was used to calculate somatic hypermutation frequencies for each IgH contig.  
760 Estimated clonal abundances and IgH diversity analyses within each donor were  
761 performed using estimateAbundance, rarefyDiversity and testDiversity of Alakazam  
762 (version 0.2.11)<sup>69</sup> with a bootstrap number of 500. Finally, the number of quality  
763 filtered and annotated IgH, IgK or IgL were determined per unique cell barcode. If  
764 more than one contig per chain was identified, metadata for that cell was ascribed as  
765 “Multi”. The subsequent metadata table was then integrated with the single-cell RNA-  
766 seq gene expression objects for annotation of IgH contigs with B cell types and  
767 downstream analysis. Co-occurrence of expanded clone members between tissues  
768 and/or cell types was reported as a binary event for each clone that contained a  
769 member within two different tissues and/or cell types.

770

### 771 **Quantifying IgA binding of bacteria**

772 Microbiome frozen in 50% glycerol were defrosted on ice before being washed in  
773 PBS and pelleted for 3 minutes at 8,000 rpm. Bacteria were then stained on ice for  
774 30 minutes with IgG-PE (Biolegend, clone HP6017), IgA1/2 biotin (BD, clone G20-  
775 359), followed by 20 minutes with streptavidin-APC (Biolegend). For isotype controls,  
776 mouse IgG1 κ Isotype- Biotin (BD) or mouse IgG2a, κ Isotype- PE (Biolegend) were  
777 used. The bacteria were washed before and after DNA was stained with  
778 Hoechst33342 (Sigma-Aldrich). The stained bacteria were sorted as Hoechst<sup>+</sup> and

779 IgG<sup>+</sup>IgA<sup>+</sup> or IgG<sup>-</sup>IgA<sup>+</sup> into PBS using the BD Influx and then stored at -80°C until DNA  
780 extraction.

781

## 782 **Genomic DNA Extraction for shotgun sequencing of IgA-bound bacteria**

783 Bacteria in PBS was defrosted on ice before being pelleted at 3900 rpm for 5  
784 minutes at 4°C. The supernatant was removed and the pellet resuspended in 2ml of  
785 25% sucrose in TE Buffer (10mM Tris pH8 and 1mM EDTA pH8). 50µl of 100mg/ml  
786 lysozyme in 0.25M Tris was added and incubated at 37°C for 1 hour. 100ul of  
787 Proteinase K (18mg/ml), 15µl of RNAase A (20mg/ml), 400µl of 0.5M EDTA (pH 8),  
788 and 250µl of 10% Sarkosyl were then added. This was left on ice for 2 hours and  
789 then incubated at 50°C. The DNA was then isolated by running through a gel,  
790 samples quantitated by qbit and pooled. Pooled DNA was sequenced on the Illumina  
791 HiSeq2500 platform. Inverse simpson (diversity) and chao (richness) of IgA-  
792 opsonised bacteria was determined by using R package “microbiome”.

793

## 794 **Data availability**

795 Raw sequencing data files are available at ArrayExpress (accession numbers: E-  
796 MTAB-8007, E-MTAB-8474, E-MTAB-8476, E-MTAB-8484 & E-MTAB-8486).

797 Sequencing data for the microbiome are available at MGnify (ERS numbers are  
798 listed in Supplementary Table 2). Processed single-cell RNA sequencing object is  
799 available for online visualisation and download at gutcellatlas.org.

800

801

## 802 **References**

- 803 1. Halfvarson, J. *et al.* Dynamics of the human gut microbiome in inflammatory  
804 bowel disease. *Nat Microbiol* **2**, 17004 (2017).
- 805 2. Donaldson, G. P., Melanie Lee, S. & Mazmanian, S. K. Gut biogeography of the  
806 bacterial microbiota. *Nature Reviews Microbiology* **14**, 20–32 (2016).
- 807 3. Zoetendal, E. G. *et al.* The human small intestinal microbiota is driven by rapid  
808 uptake and conversion of simple carbohydrates. *ISME J.* **6**, 1415–1426 (2012).
- 809 4. Cummings, J. H. & Macfarlane, G. T. The control and consequences of bacterial  
810 fermentation in the human colon. *J. Appl. Bacteriol.* **70**, 443–459 (1991).
- 811 5. Wang, X., Heazlewood, S. P., Krause, D. O. & Florin, T. H. J. Molecular  
812 characterization of the microbial species that colonize human ileal and colonic  
813 mucosa by using 16S rDNA sequence analysis. *J. Appl. Microbiol.* **95**, 508–520  
814 (2003).
- 815 6. Mowat, A. M. & Agace, W. W. Regional specialization within the intestinal  
816 immune system. *Nat. Rev. Immunol.* **14**, 667–685 (2014).
- 817 7. Denning, T. L. *et al.* Functional Specializations of Intestinal Dendritic Cell and  
818 Macrophage Subsets That Control Th17 and Regulatory T Cell Responses Are  
819 Dependent on the T Cell/APC Ratio, Source of Mouse Strain, and Regional  
820 Localization. *The Journal of Immunology* **187**, 733–747 (2011).
- 821 8. Atarashi, K. *et al.* Th17 Cell Induction by Adhesion of Microbes to Intestinal  
822 Epithelial Cells. *Cell* **163**, 367–380 (2015).
- 823 9. Ivanov, I. I. *et al.* Induction of intestinal Th17 cells by segmented filamentous  
824 bacteria. *Cell* **139**, 485–498 (2009).
- 825 10. Atarashi, K. *et al.* Induction of colonic regulatory T cells by indigenous  
826 *Clostridium* species. *Science* **331**, 337–341 (2011).

- 827 11. Mazmanian, S. K., Liu, C. H., Tzianabos, A. O. & Kasper, D. L. An  
828 immunomodulatory molecule of symbiotic bacteria directs maturation of the host  
829 immune system. *Cell* **122**, 107–118 (2005).
- 830 12. Atarashi, K. *et al.* Ectopic colonization of oral bacteria in the intestine drives TH1  
831 cell induction and inflammation. *Science* **358**, 359–365 (2017).
- 832 13. Fanning, S. *et al.* Bifidobacterial surface-exopolysaccharide facilitates  
833 commensal-host interaction through immune modulation and pathogen  
834 protection. *Proc. Natl. Acad. Sci. U. S. A.* **109**, 2108–2113 (2012).
- 835 14. Bozorov, T. A., Rasulov, B. A. & Zhang, D. Characterization of the gut  
836 microbiota of invasive *Agilus mali* Matsumara (Coleoptera: Buprestidae) using  
837 high-throughput sequencing: uncovering plant cell-wall degrading bacteria. *Sci.*  
838 *Rep.* **9**, 4923 (2019).
- 839 15. Consortium, T. H. M. P. & The Human Microbiome Project Consortium.  
840 Structure, function and diversity of the healthy human microbiome. *Nature* **486**,  
841 207–214 (2012).
- 842 16. Wu, G. D. *et al.* Linking long-term dietary patterns with gut microbial  
843 enterotypes. *Science* **334**, 105–108 (2011).
- 844 17. Jones, R. B. *et al.* Inter-niche and inter-individual variation in gut microbial  
845 community assessment using stool, rectal swab, and mucosal samples. *Sci.*  
846 *Rep.* **8**, 4139 (2018).
- 847 18. Smillie, C. S. *et al.* Rewiring of the cellular and inter-cellular landscape of the  
848 human colon during ulcerative colitis. (2018). doi:10.1101/455451
- 849 19. Chakarov, S. *et al.* Two distinct interstitial macrophage populations coexist  
850 across tissues in specific subtissular niches. *Science* **363**, (2019).
- 851 20. Kumar, B. V. *et al.* Human Tissue-Resident Memory T Cells Are Defined by

- 852 Core Transcriptional and Functional Signatures in Lymphoid and Mucosal Sites.  
853 *Cell Rep.* **20**, 2921–2934 (2017).
- 854 21. Cook, D. N. *et al.* CCR6 mediates dendritic cell localization, lymphocyte  
855 homeostasis, and immune responses in mucosal tissue. *Immunity* **12**, 495–503  
856 (2000).
- 857 22. Ward, S. Faculty of 1000 evaluation for Transcription factor KLF2 regulates the  
858 migration of naive T cells by restricting chemokine receptor expression patterns.  
859 *F1000 - Post-publication peer review of the biomedical literature* (2008).  
860 doi:10.3410/f.1103864.560997
- 861 23. Toribio-Fernández, R. *et al.* Lamin A/C augments Th1 differentiation and  
862 response against vaccinia virus and *Leishmania major*. *Cell Death Dis.* **9**, 9  
863 (2018).
- 864 24. Mateyak, M. K. & Kinzy, T. G. eEF1A: thinking outside the ribosome. *J. Biol.*  
865 *Chem.* **285**, 21209–21213 (2010).
- 866 25. Lönnberg, T. *et al.* Single-cell RNA-seq and computational analysis using  
867 temporal mixture modelling resolves Th1/Tfh fate bifurcation in malaria. *Sci*  
868 *Immunol* **2**, (2017).
- 869 26. Miragaia, R. J. *et al.* Single-Cell Transcriptomics of Regulatory T Cells Reveals  
870 Trajectories of Tissue Adaptation. *Immunity* (2019).  
871 doi:10.1016/j.immuni.2019.01.001
- 872 27. Miyao, T. *et al.* Plasticity of Foxp3 T Cells Reflects Promiscuous Foxp3  
873 Expression in Conventional T Cells but Not Reprogramming of Regulatory T  
874 Cells. *Immunity* **36**, 262–275 (2012).
- 875 28. Mucida, D. *et al.* Oral tolerance in the absence of naturally occurring Tregs. *J.*  
876 *Clin. Invest.* **115**, 1923–1933 (2005).

- 877 29. Povoleri, G. A. M. *et al.* Human retinoic acid-regulated CD161 regulatory T cells  
878 support wound repair in intestinal mucosa. *Nat. Immunol.* **19**, 1403–1414  
879 (2018).
- 880 30. Schiering, C. *et al.* The alarmin IL-33 promotes regulatory T-cell function in the  
881 intestine. *Nature* **513**, 564–568 (2014).
- 882 31. Krzysiek, R. *et al.* Antigen receptor engagement selectively induces  
883 macrophage inflammatory protein-1 alpha (MIP-1 alpha) and MIP-1 beta  
884 chemokine production in human B cells. *J. Immunol.* **162**, 4455–4463 (1999).
- 885 32. Takahashi, K. *et al.* CCL3 and CCL4 are biomarkers for B cell receptor pathway  
886 activation and prognostic serum markers in diffuse large B cell lymphoma.  
887 *British Journal of Haematology* **171**, 726–735 (2015).
- 888 33. Burger, J. A. *et al.* High-level expression of the T-cell chemokines CCL3 and  
889 CCL4 by chronic lymphocytic leukemia B cells in nurselike cell cocultures and  
890 after BCR stimulation. *Blood* **113**, 3050–3058 (2009).
- 891 34. Mencarelli, A. *et al.* Highly specific blockade of CCR5 inhibits leukocyte  
892 trafficking and reduces mucosal inflammation in murine colitis. *Sci. Rep.* **6**,  
893 30802 (2016).
- 894 35. Zhang, Y. *et al.* Plasma cell output from germinal centers is regulated by signals  
895 from Tfh and stromal cells. *J. Exp. Med.* **215**, 1227–1243 (2018).
- 896 36. Caraux, A. *et al.* Circulating human B and plasma cells. Age-associated  
897 changes in counts and detailed characterization of circulating normal CD138-  
898 and CD138 plasma cells. *Haematologica* **95**, 1016–1020 (2010).
- 899 37. Hieshima, K. *et al.* CC chemokine ligands 25 and 28 play essential roles in  
900 intestinal extravasation of IgA antibody-secreting cells. *J. Immunol.* **173**, 3668–  
901 3675 (2004).

- 902 38. Hu, K. *et al.* CCL19 and CCL28 Augment Mucosal and Systemic Immune  
903 Responses to HIV-1 gp140 by Mobilizing Responsive Immunocytes into  
904 Secondary Lymph Nodes and Mucosal Tissue. *The Journal of Immunology* **191**,  
905 1935–1947 (2013).
- 906 39. Mora, J. R. & von Andrian, U. H. Differentiation and homing of IgA-secreting  
907 cells. *Mucosal Immunol.* **1**, 96 (2008).
- 908 40. Zhang, W. *et al.* Characterization of the B Cell Receptor Repertoire in the  
909 Intestinal Mucosa and of Tumor-Infiltrating Lymphocytes in Colorectal Adenoma  
910 and Carcinoma. *The Journal of Immunology* **198**, 3719–3728 (2017).
- 911 41. Petrova, V. N. *et al.* Combined Influence of B-Cell Receptor Rearrangement and  
912 Somatic Hypermutation on B-Cell Class-Switch Fate in Health and in Chronic  
913 Lymphocytic Leukemia. *Front. Immunol.* **9**, 1784 (2018).
- 914 42. Macpherson, A. J. A Primitive T Cell-Independent Mechanism of Intestinal  
915 Mucosal IgA Responses to Commensal Bacteria. *Science* **288**, 2222–2226  
916 (2000).
- 917 43. Harbour, S. N., Maynard, C. L., Zindl, C. L., Schoeb, T. R. & Weaver, C. T. Th17  
918 cells give rise to Th1 cells that are required for the pathogenesis of colitis. *Proc.*  
919 *Natl. Acad. Sci. U. S. A.* **112**, 7061–7066 (2015).
- 920 44. Ferreira, R. C. *et al.* Cells with Treg-specific FOXP3 demethylation but low  
921 CD25 are prevalent in autoimmunity. *J. Autoimmun.* **84**, 75–86 (2017).
- 922 45. Hoffmann, P. *et al.* Loss of FOXP3 expression in natural human CD4+CD25+  
923 regulatory T cells upon repetitive in vitro stimulation. *Eur. J. Immunol.* **39**, 1088–  
924 1097 (2009).
- 925 46. Kyewski, B. & Suri-Payer, E. *CD4+CD25+ Regulatory T Cells: Origin, Function*  
926 *and Therapeutic Potential.* (Springer Science & Business Media, 2006).



- 927 47. Brandtzaeg, P. Function of mucosa-associated lymphoid tissue in antibody  
928 formation. *Immunol. Invest.* **39**, 303–355 (2010).
- 929 48. Meng, W. *et al.* An atlas of B-cell clonal distribution in the human body. *Nat.*  
930 *Biotechnol.* **35**, 879–884 (2017).
- 931 49. Dunn-Walters, D. K., Boursier, L. & Spencer, J. Hypermutation, diversity and  
932 dissemination of human intestinal lamina propria plasma cells. *Eur. J. Immunol.*  
933 **27**, 2959–2964 (1997).
- 934 50. Tsuji, M. *et al.* Requirement for Lymphoid Tissue-Inducer Cells in Isolated  
935 Follicle Formation and T Cell-Independent Immunoglobulin A Generation in the  
936 Gut. *Immunity* **29**, 261–271 (2008).
- 937 51. van der Waaij, L. A., Limburg, P. C., Mesander, G. & van der Waaij, D. In vivo  
938 IgA coating of anaerobic bacteria in human faeces. *Gut* **38**, 348–354 (1996).
- 939 52. Imam, T., Park, S., Kaplan, M. H. & Olson, M. R. Effector T Helper Cell Subsets  
940 in Inflammatory Bowel Diseases. *Front. Immunol.* **9**, 1212 (2018).
- 941 53. Castro-Dopico, T. *et al.* Anti-commensal IgG Drives Intestinal Inflammation and  
942 Type 17 Immunity in Ulcerative Colitis. *Immunity* (2019).  
943 doi:10.1016/j.immuni.2019.02.006
- 944 54. Cunningham-Rundles, C. Physiology of IgA and IgA deficiency. *J. Clin.*  
945 *Immunol.* **21**, 303–309 (2001).
- 946 55. Moon, C. *et al.* Vertically transmitted faecal IgA levels determine extra-  
947 chromosomal phenotypic variation. *Nature* **521**, 90–93 (2015).
- 948 56. Wolf, F. A., Angerer, P. & Theis, F. J. SCANPY: large-scale single-cell gene  
949 expression data analysis. *Genome Biol.* **19**, 15 (2018).
- 950 57. Park, J.-E., Polański, K., Meyer, K. & Teichmann, S. A. Fast Batch Alignment of  
951 Single Cell Transcriptomes Unifies Multiple Mouse Cell Atlases into an

- 952 Integrated Landscape. doi:10.1101/397042
- 953 58. Stuart, T. *et al.* Comprehensive Integration of Single-Cell Data. *Cell* **177**, 1888–  
954 1902.e21 (2019).
- 955 59. Trapnell, C. *et al.* The dynamics and regulators of cell fate decisions are  
956 revealed by pseudotemporal ordering of single cells. *Nature Biotechnology* **32**,  
957 381–386 (2014).
- 958 60. Browne, H. P. *et al.* Culturing of ‘unculturable’ human microbiota reveals novel  
959 taxa and extensive sporulation. *Nature* **533**, 543–546 (2016).
- 960 61. Kozich, J. J., Westcott, S. L., Baxter, N. T., Highlander, S. K. & Schloss, P. D.  
961 Development of a dual-index sequencing strategy and curation pipeline for  
962 analyzing amplicon sequence data on the MiSeq Illumina sequencing platform.  
963 *Appl. Environ. Microbiol.* **79**, 5112–5120 (2013).
- 964 62. Price, M. N., Dehal, P. S. & Arkin, A. P. FastTree 2 – Approximately Maximum-  
965 Likelihood Trees for Large Alignments. *PLoS One* **5**, e9490 (2010).
- 966 63. Letunic, I. & Bork, P. Interactive tree of life (iTOL) v3: an online tool for the  
967 display and annotation of phylogenetic and other trees. *Nucleic Acids Res.* **44**,  
968 W242–5 (2016).
- 969 64. Stubbington, M. J. T. *et al.* T cell fate and clonality inference from single-cell  
970 transcriptomes. *Nat. Methods* **13**, 329–332 (2016).
- 971 65. Bolotin, D. A. *et al.* MiXCR: software for comprehensive adaptive immunity  
972 profiling. *Nat. Methods* **12**, 380–381 (2015).
- 973 66. Nazarov, V. I. *et al.* tcR: an R package for T cell receptor repertoire advanced  
974 data analysis. *BMC Bioinformatics* **16**, (2015).
- 975 67. Heiden, J. A. V. *et al.* pRESTO: a toolkit for processing high-throughput  
976 sequencing raw reads of lymphocyte receptor repertoires. *Bioinformatics* **30**,

977 1930–1932 (2014).

978 68. Ye, J., Ma, N., Madden, T. L. & Ostell, J. M. IgBLAST: an immunoglobulin  
979 variable domain sequence analysis tool. *Nucleic Acids Research* **41**, W34–W40  
980 (2013).

981 69. Gupta, N. T. *et al.* Change-O: a toolkit for analyzing large-scale B cell  
982 immunoglobulin repertoire sequencing data. *Bioinformatics* **31**, 3356–3358  
983 (2015).

984

985 **Figure Legends:**

986

987 **Figure 1: Profiling immune cells along the steady-state colon.** a) Workflow for  
988 16S ribosomal sequencing of matching mucosal microbiomes (n=12 donors) and  
989 scRNA-seq profiling of immune cells from mesenteric lymph node (mLN), and lamina  
990 propria of caecum, transverse colon and sigmoid colon (n=6 donors). b)  
991 Phylogenetic tree representing diversity and mean abundance of bacterial species in  
992 the caecum, transverse colon and sigmoid colon. Mean abundance was calculated  
993 as the percentage of OTU for each species from total as determined by 16S  
994 ribosomal sequencing and averaged for twelve donors (black scale). Unassigned  
995 OTUs are shown as black branches. Bacteria groups of interest are highlighted. c)  
996 Relative abundances of OTUs at genus level of bacteria species in colon as in b. d)  
997 Clustering of pooled immune cells visualised in a UMAP plot coloured by tissue of  
998 origin (left) and cell type annotation (right). e) Mean expression level and percentage  
999 of cells expressing marker genes used to annotate clusters in d. f) Relative  
1000 percentages of CD4<sup>+</sup> T subpopulations within all CD4<sup>+</sup> T cells for each tissue as in d.  
1001 g) Relative percentages of cell types within all non-CD4<sup>+</sup> T immune cells for each  
1002 tissue as in d, with B cells shown in the left panel and all other cell types in the right  
1003 panel.

1004

1005 **Figure 2: Dissemination of T helper cells in colon and region-determined**  
1006 **transcriptional profiles.** a) Correlation matrix of mean transcriptional profiles of Th1  
1007 and Th17 cells from caecum, transverse colon, sigmoid colon and mLN (n=5  
1008 donors). b) Mean expression level of differentially expressed genes of T helper cells  
1009 between caecum, transverse colon and sigmoid colon. c) UMAP projection of

1010 Smartseq2 profiled Th1 and Th17 cells of the caecum, transverse colon and sigmoid  
1011 colon (n=1 donor). Colour lines connect cells sharing the same CDR3 sequence. d)  
1012 Heatmap of numbers of members within clonal families in Th1/Th17 subsets (left)  
1013 and colon region (right).

1014

1015 **Figure 3: Treg activation pathway from lymphoid to peripheral tissue.** a) UMAP  
1016 visualisation of Treg subtypes in mLN (left) and colonic regions (right) (n=5 donors).  
1017 b) Relative proportions of Treg subsets within all Treg cells from mLN and colon  
1018 tissue regions. Bars show mean proportion across all donors (circles). c) Density of  
1019 Treg subclusters as in a across 'pseudospace' (top) and expression kinetics of  
1020 genes contributing to pseudospace smoothed into 100 bins (filtered by  $qval < 0.001$   
1021 and expression in  $>15$  cells). Top bar shows most represented tissue within each  
1022 bin. Various dynamically expressed immune-related molecules are annotated, with  
1023 key genes coloured red.

1024

1025 **Figure 4: B cells are more abundant, clonal expanded and mutated in the**  
1026 **sigmoid colon.** a) Log normalised mean transcript counts of key differentially  
1027 expressed activation and tissue-migration genes by IgA<sup>+</sup> plasma cells in caecum,  
1028 transverse colon and sigmoid colon (n=5 donors). b) Proportion of CD27<sup>+</sup> B cells of  
1029 total B cells from colon regions determined by flow cytometry (n=4 donors). Bar  
1030 represents mean proportion and connected points represents values of each donor.  
1031 Analysis is a two-tailed paired t test. c) Clustering of B cells for which matched  
1032 single-cell VDJ libraries were derived using 10x Genomics 5' scRNA-seq (n=2  
1033 donors). B cells are visualised by UMAP projection coloured by cell type annotation  
1034 (left), tissue of origin (middle) and antibody isotype (right). Antibody isotype

1035 frequencies per annotated cell type across both donors are depicted as a bar plot  
1036 (far right). d) Somatic hypermutation frequencies of single-cell VDJ-derived IgH  
1037 sequences as in c. e) Quantitation of somatic hypermutation frequencies of single-  
1038 cell VDJ-derived IgH sequences from B cell types and gut regions. f) Estimated  
1039 clonal abundances per donor for members of expanded B cell clones in B cell types  
1040 and gut regions. g) Co-occurrence of expanded B cell clones identified by single-cell  
1041 VDJ analysis shared across colon regions as in c. Numbers reflect binary detection  
1042 event rather than the number of members per clone shared. h) Co-occurrence of  
1043 expanded B cell clones identified by bulk B cell receptor (BCR) sequencing shared  
1044 across mLN, caecum, transverse colon and sigmoid colon (n=3 donors). Rows and  
1045 columns in g and h are ordered by hierarchical clustering.

1046

1047 **Figure 5: Increasing number of microbiome species recognised by antibodies**

1048 **in the sigmoid colon.** a) Experimental workflow for assessing Ig-opsonised colon  
1049 bacterial species. b) Representative histogram of IgA1/2-bound Hoechst<sup>+</sup> bacteria  
1050 and summary plot of bound bacteria as a proportion of total bacteria (n=13 donors).  
1051 Positive binding is set against an isotype control. c) Richness of bacteria species  
1052 determined as the number of unique species and d) diversity of species identified  
1053 from shotgun sequencing of Ig-opsonised bacteria from b (n=6 donors). e) Summary  
1054 schematic showing proximal-to-distal increasing in accumulation, targeted migration,  
1055 clonal expansion and mutation frequency of IgA<sup>+</sup> plasma cell, and associated  
1056 increasing diversity of reactive bacteria. P values were calculated using two-tailed  
1057 paired ANOVA with multiple comparisons (b) and one-tailed paired ANOVA with  
1058 multiple comparisons (c and d).

1059

1060 **Supplementary Figure 1: Single-cell mapping of immune cells in the steady-**  
1061 **state human colon.**

1062 a) Shannon diversity score of bacterial OTUs from mucosa surfaces of the caecum,  
1063 transverse colon and sigmoid colon (n=12 donors). b) Relative abundances of OTUs  
1064 at phylum level as in a. c) Relative abundances of *Bacteroides*, *Coprobacillus*,  
1065 *Shigella* and *Enterococcus spp.* in colon regions as in a, with lines connecting  
1066 samples from each donor. d) Flow cytometry-sorting strategy for single, live, CD45<sup>+</sup>,  
1067 CD3<sup>-</sup>, CD4<sup>-</sup> immune cells (red) and single, live, CD45<sup>+</sup>, CD3<sup>+</sup>, CD4<sup>+</sup> T cells (blue)  
1068 from mLN (top) and colon lamina propria (bottom). e) UMAP projection of all cells  
1069 after filtering and QC (as in Figure 1d & 1e), with the five donors represented as  
1070 different colours. b & c) Bars show mean proportion in each region and statistical  
1071 significances are calculated from 2-way ANOVA with Tukey's multiple corrections of  
1072 the total OTU dataset. \*  $P < 0.05$ ; \*\*  $P < 0.01$ ; \*\*\*\*  $P < 0.0001$

1073

1074 **Supplementary Figure 2: Defining T helper cell transcriptional signatures in the**  
1075 **colon.**

1076 a) Heatmap of differentially expressed genes with filtering of 0.25 log fold change  
1077 and minimum percent expression of 10% between Th1 and Th17 cells pooled from  
1078 caecum, transverse colon and sigmoid colon (n=5 donors). Rows are ordered by  
1079 hierarchical clustering and columns are grouped by cell type as denoted in the  
1080 column annotation.

1081

1082 **Supplementary Figure 3: Treg subsets form a lymphoid-to-periphery activation**  
1083 **trajectory.**

1084 a) Log mean expression level and percentage of marker genes used to annotate  
1085 Treg subsets in mLN and colon (n=5 donors). Gradient bar represents shift in  
1086 function of marker genes. b) tSNE projection of clustering of Treg subsets and  
1087 conventional CD4+ T cells of mLN and colon dataset.  
1088

1089 **Supplementary Figure 4: Characterising B cell phenotypes and BCR**  
1090 **expression in mLN and colon regions.**

1091 a) BCR diversity rarefaction analysis of IgA+ plasma cell clones across multiple  
1092 diversity orders (Q) using single-cell VDJ-derived IgH sequences (n=2 donors). This  
1093 reveals comparable diversity between donors. b) Same as in a), but expanded IgA+  
1094 plasma cell clones from both donors were pooled and were instead separated by gut  
1095 regions for BCR diversity rarefaction analysis (upper panel). Lower panels represent  
1096 the results from significance tests of the diversity index between gut regions at either  
1097  $Q = 0$  (left; corresponding to species richness measure) or  $Q = 1$  (right;  
1098 corresponding to the exponential of the Shannon-Weiner index). c) Co-occurrence of  
1099 expanded B cell clones identified by single-cell VDJ analysis that are shared across  
1100 different gut regions and between different cell types. Numbers reflect a binary  
1101 detection event rather than the number of members per clone shared. d) Frequency  
1102 of variable and joining BCR sequence expression in mLN and colon regions,  
1103 detected by bulk BCR sequencing (n=3 donors). Rows are ordered by hierarchical  
1104 clustering.

1105 **Supplementary Table 1: Metadata of deceased transplant donors involved in**  
1106 **this study**



| <b>ID</b> | <b>Sex</b> | <b>Age</b> | <b>Death</b> | <b>Approx. BMI</b> | <b>CMV/EBV</b> | <b>Antibiotics prescribed within 2 weeks of death</b> |
|-----------|------------|------------|--------------|--------------------|----------------|-------------------------------------------------------|
| 287c      | M          | 50-54      | DCD          | 22                 | CMV-/EBV+      | Ceftriaxone, Meropenem, Metronidazole                 |
| 290b      | F          | 60-64      | DBD          | 28                 | CMV+/EBV+      |                                                       |
| 296c      | F          | 35-40      | DCD          | 21                 | CMV-/EBV+      | Tazocin                                               |
| 298c      | M          | 55-60      | DCD          | 24                 | CMV-/EBV+      |                                                       |
| 302c      | M          | 40-44      | DCD          | 35                 | CMV-/EBV-      |                                                       |
| 312c      | M          | 75-80      | DCD          | 24                 | CMV+/EBV+      |                                                       |
| 362c      | M          | 60-65      | DCD          | 27                 | CMV-/EBV+      |                                                       |
| 364b      | M          | 50-55      | DBD          | 26                 | CMV-/EBV+      |                                                       |
| 367b      | M          | 65-70      | DBD          | 25                 | CMV+/EBV+      |                                                       |
| 390c      | F          | 65-70      | DCD          | 35                 | CMV+/EBV+      |                                                       |
| 403c      | M          | 50-55      | DCD          | 33                 | CMV+/EBV+      | Tazocin                                               |
| 411c      | M          | 25-30      | DCD          | 25                 | CMV+/EBV+      | Meropenem                                             |
| 414c      | M          | 50-55      | DCD          | 30                 | CMV-/EBV+      |                                                       |
| 417c      | M          | 65-70      | DCD          | 25                 | CMV-/EBV+      |                                                       |

1107

1108

**Figure 1**

**a**

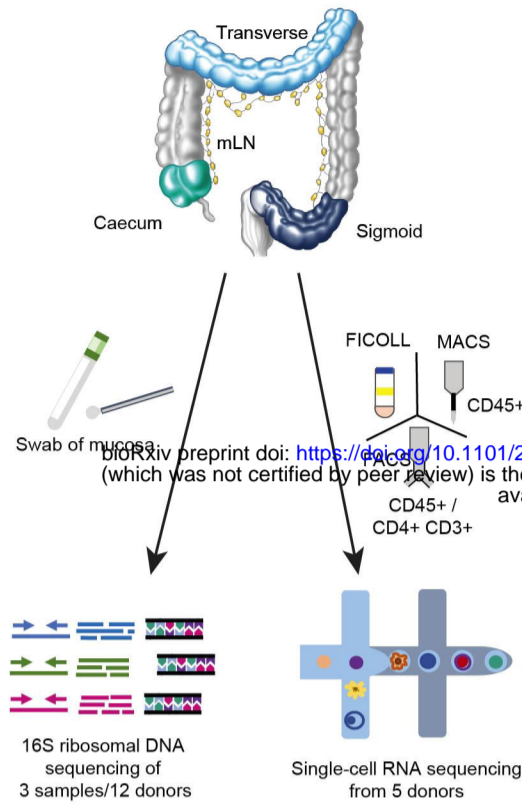

**b**

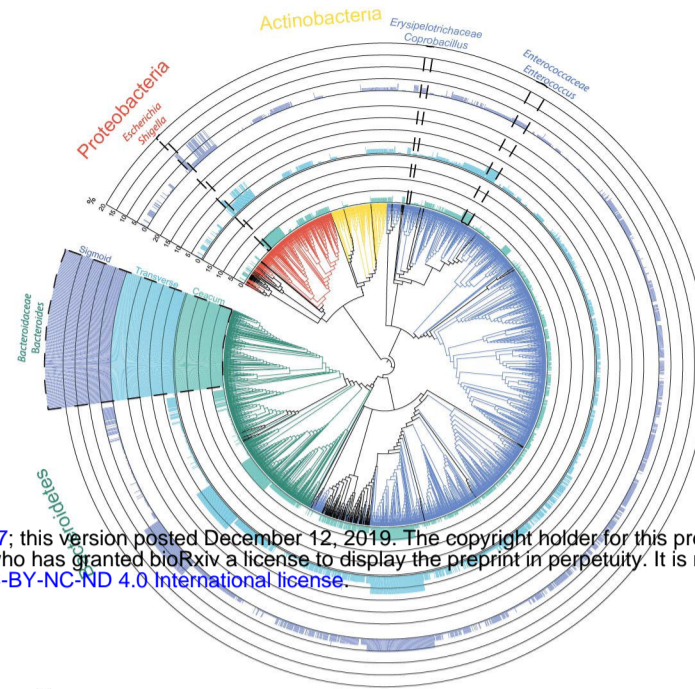

**c**

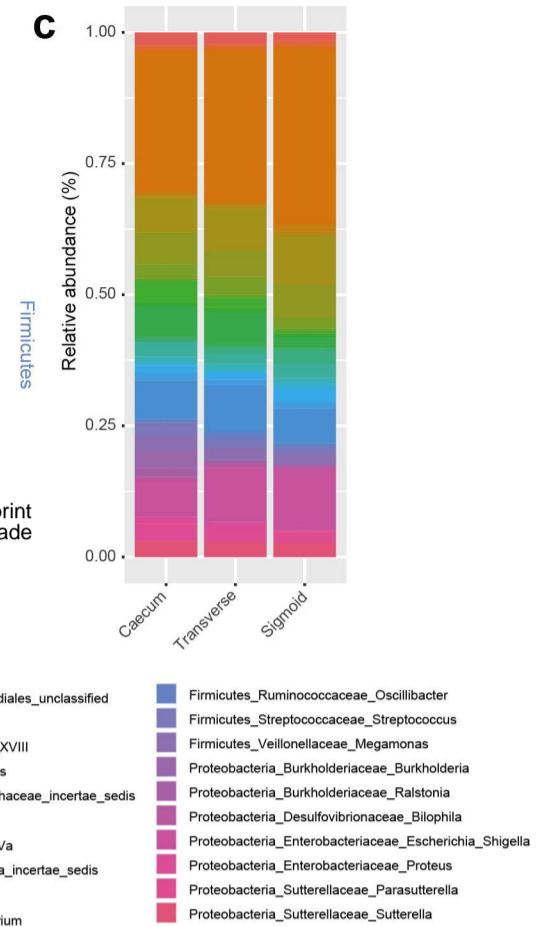

**d**

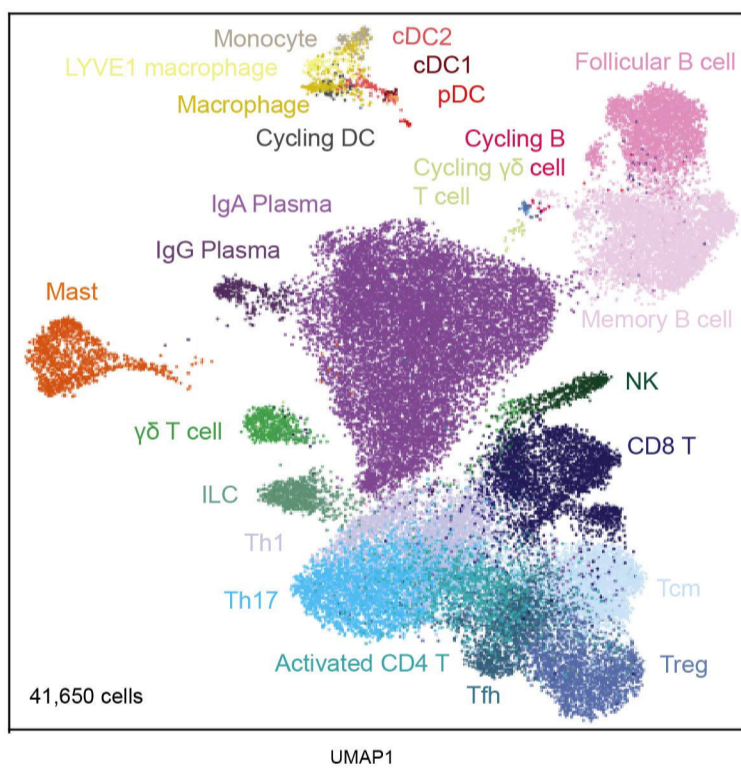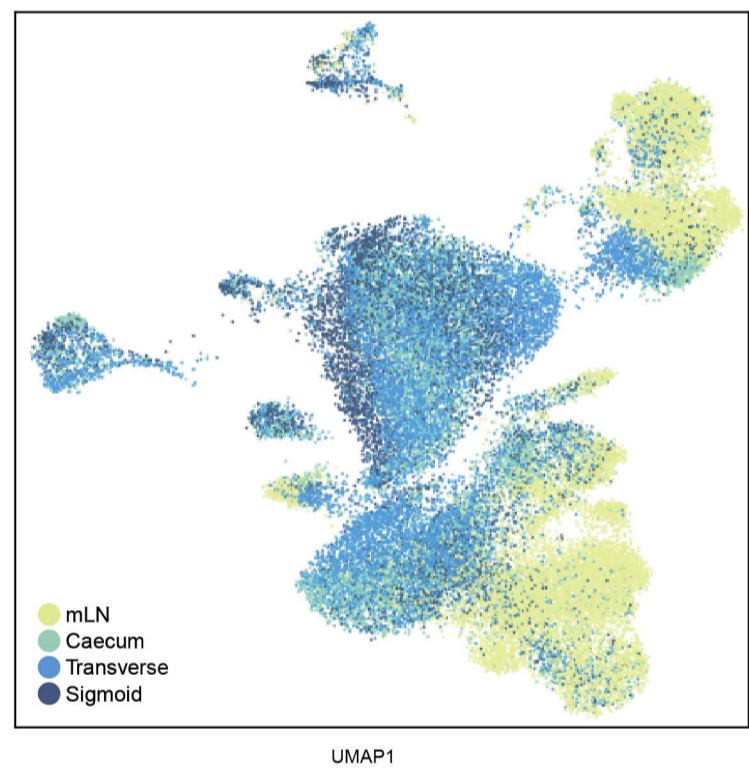

**e**

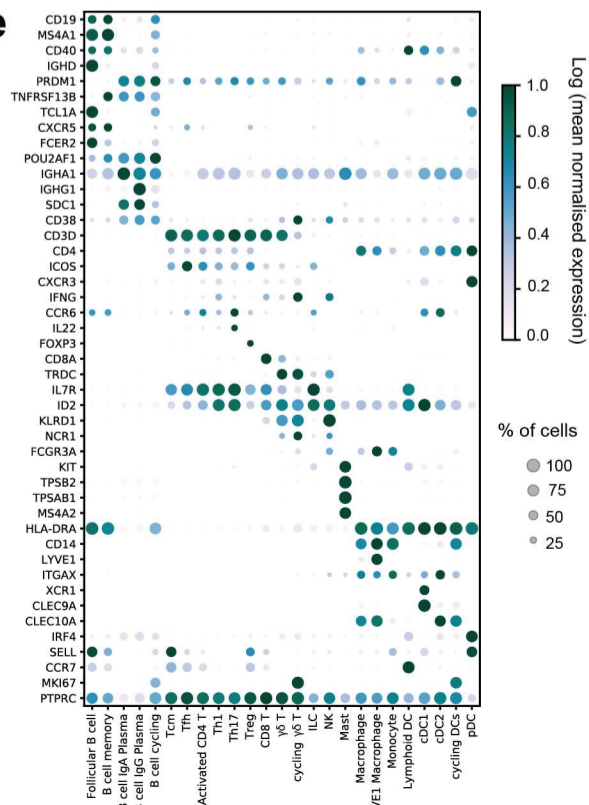

**f**

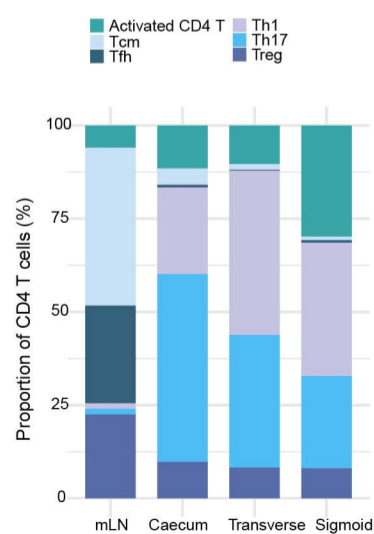

**g**

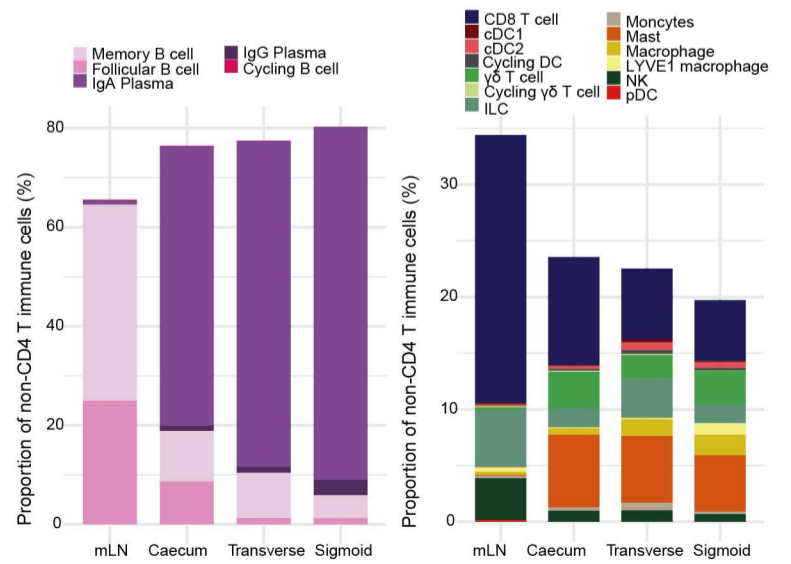

# Figure 2

**a**

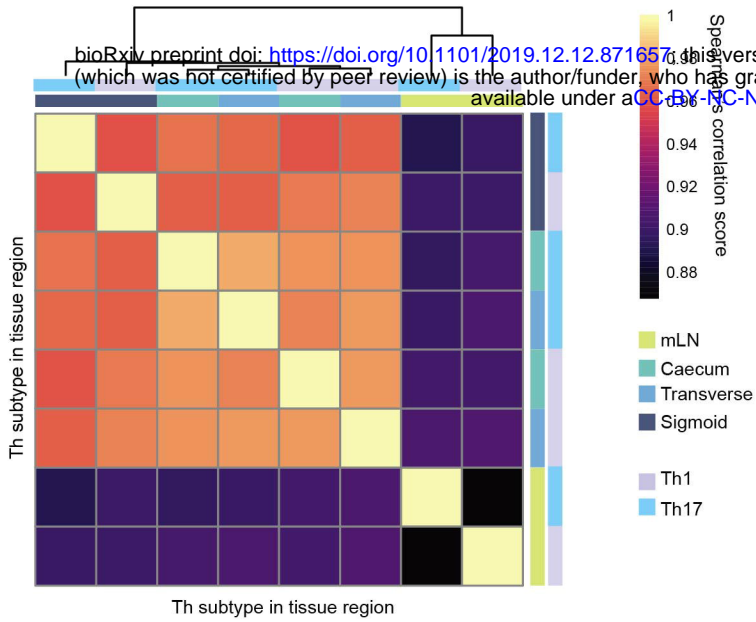

**b**

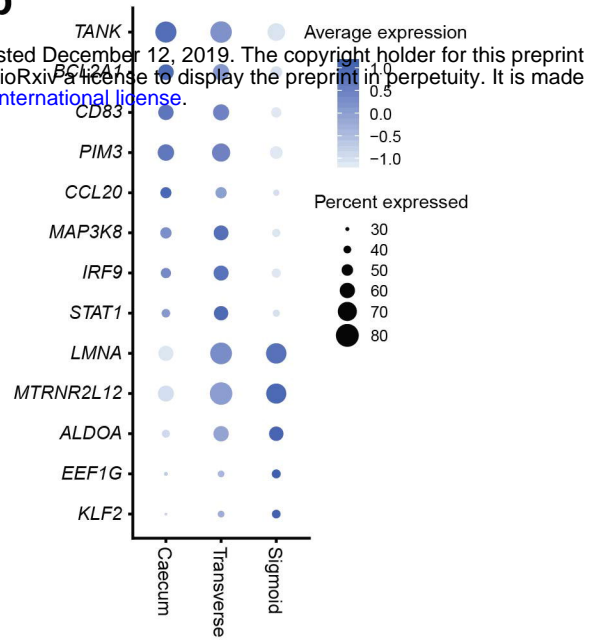

**c**

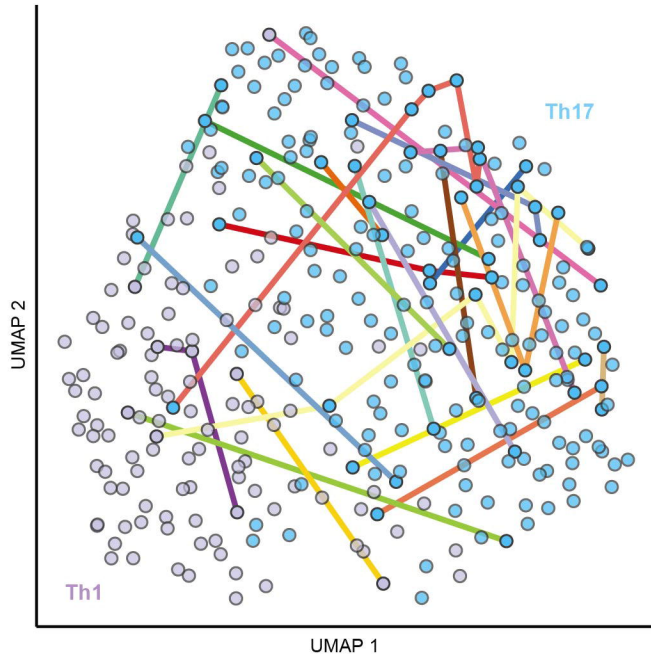

**d**

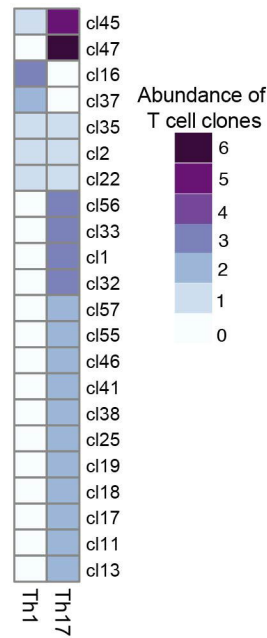

**e**

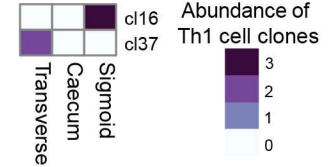

**f**

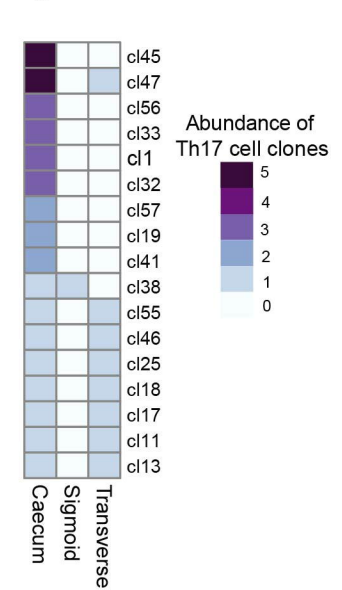

# Figure 3

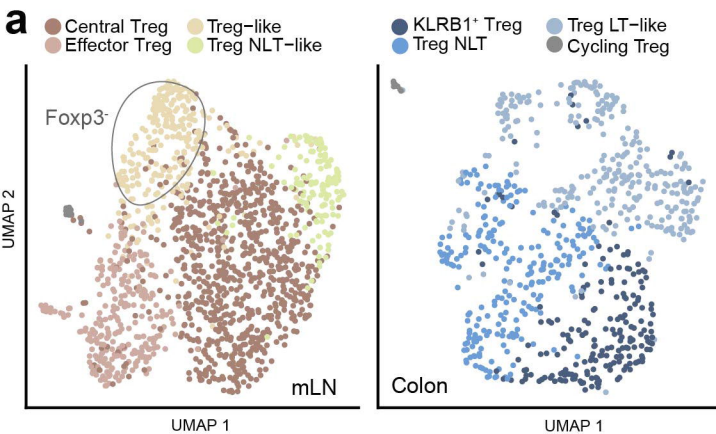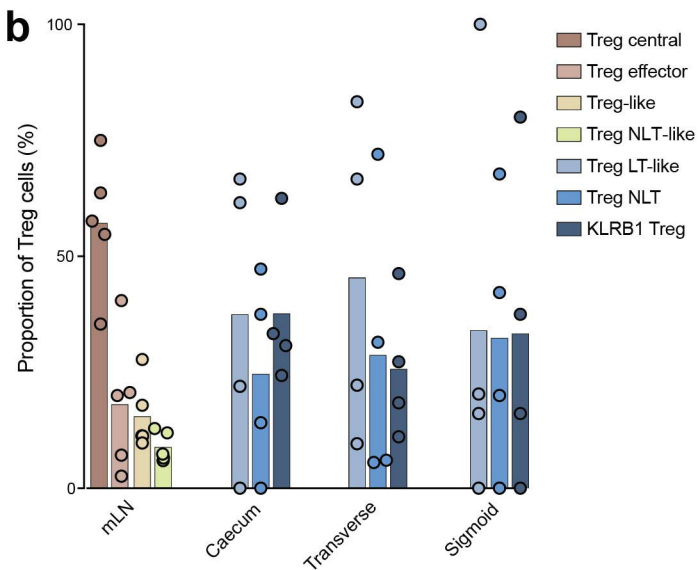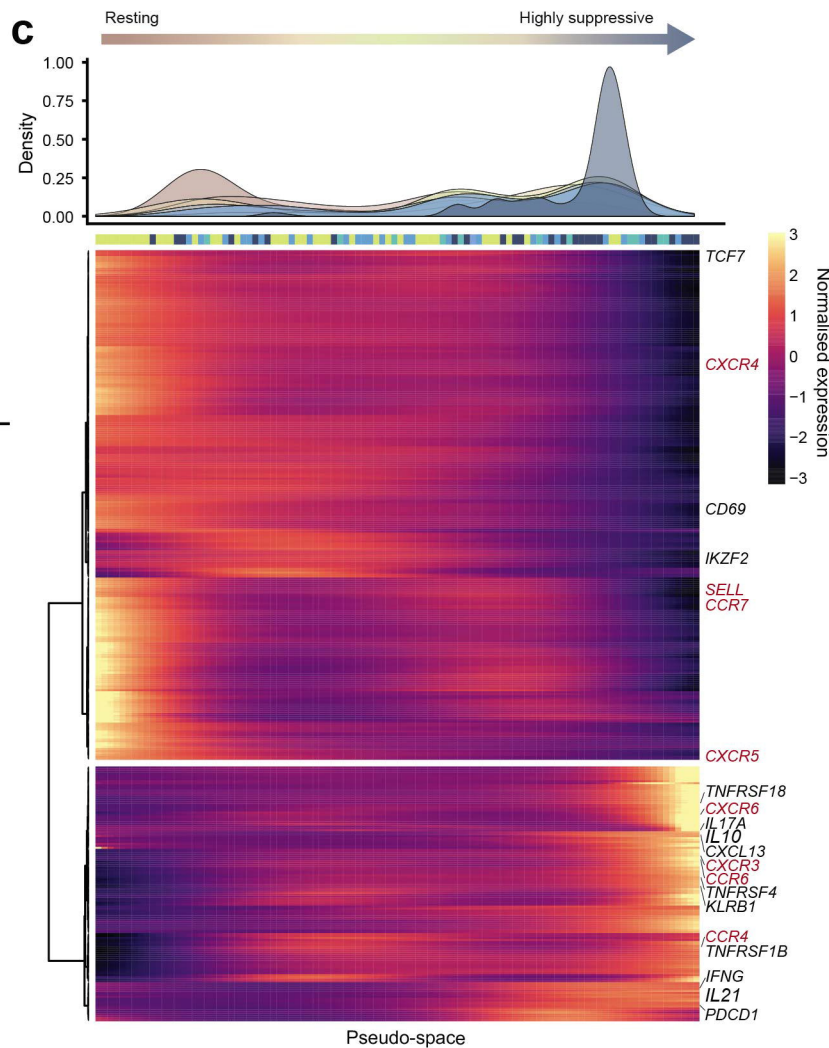

# Figure 4

bioRxiv preprint doi: <https://doi.org/10.1101/2019.12.12.871657>; this version posted December 12, 2019. The copyright holder for this preprint (which was not certified by peer review) is the author/funder, who has granted bioRxiv a license to display the preprint in perpetuity. It is made available under aCC-BY-NC-ND 4.0 International license.

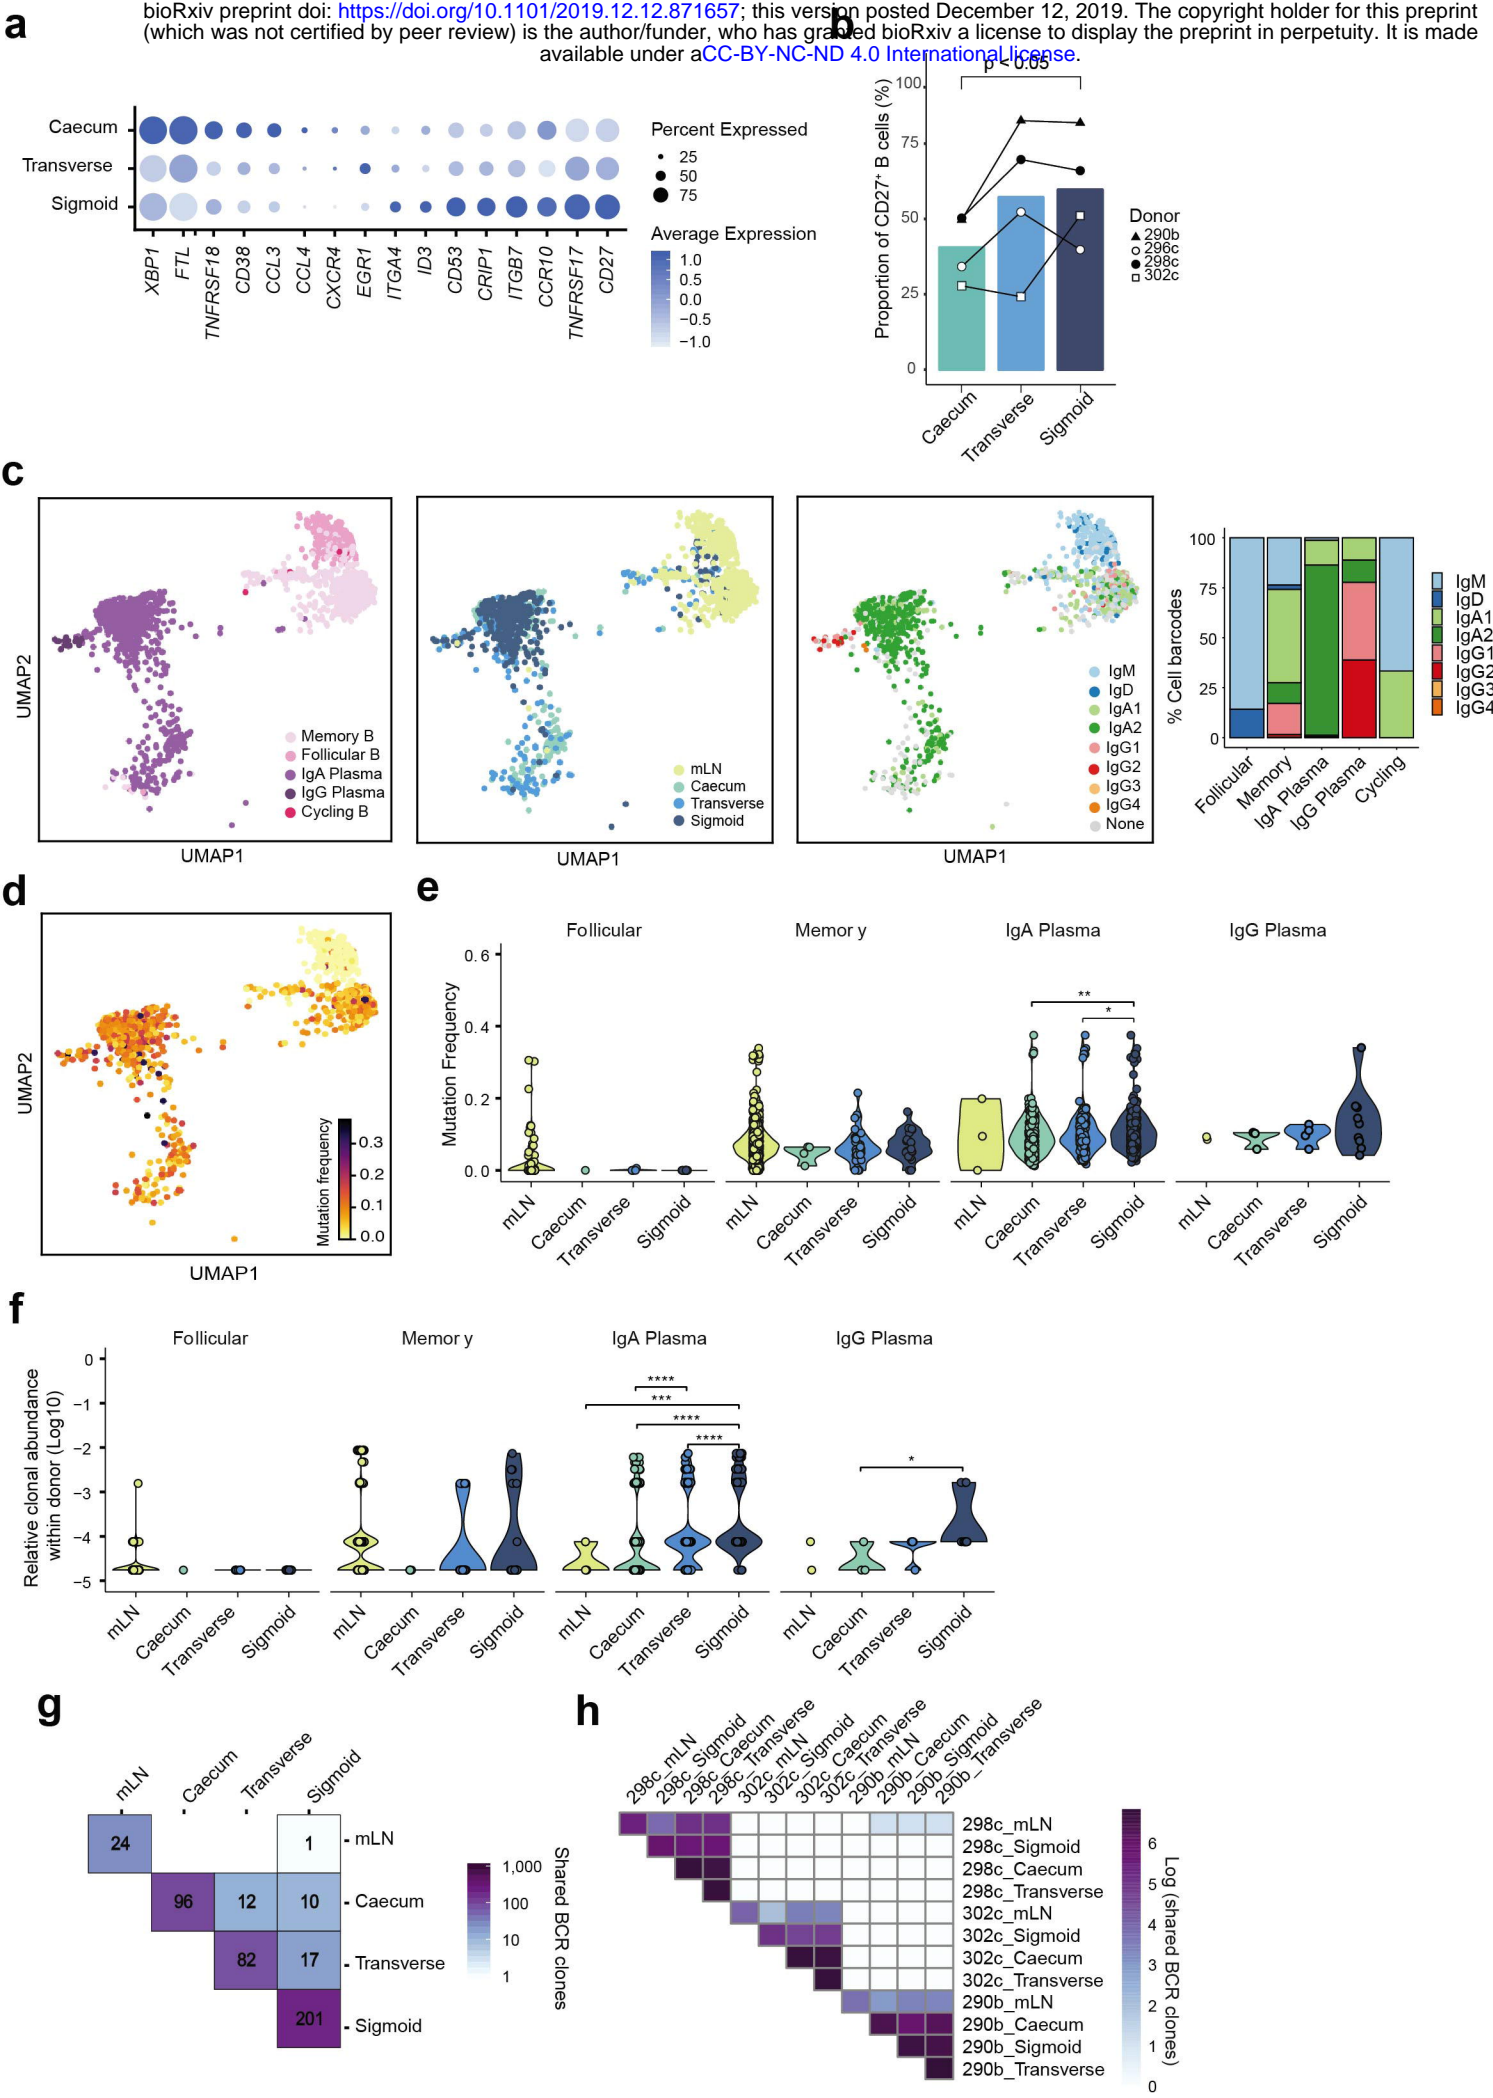

# Figure 5

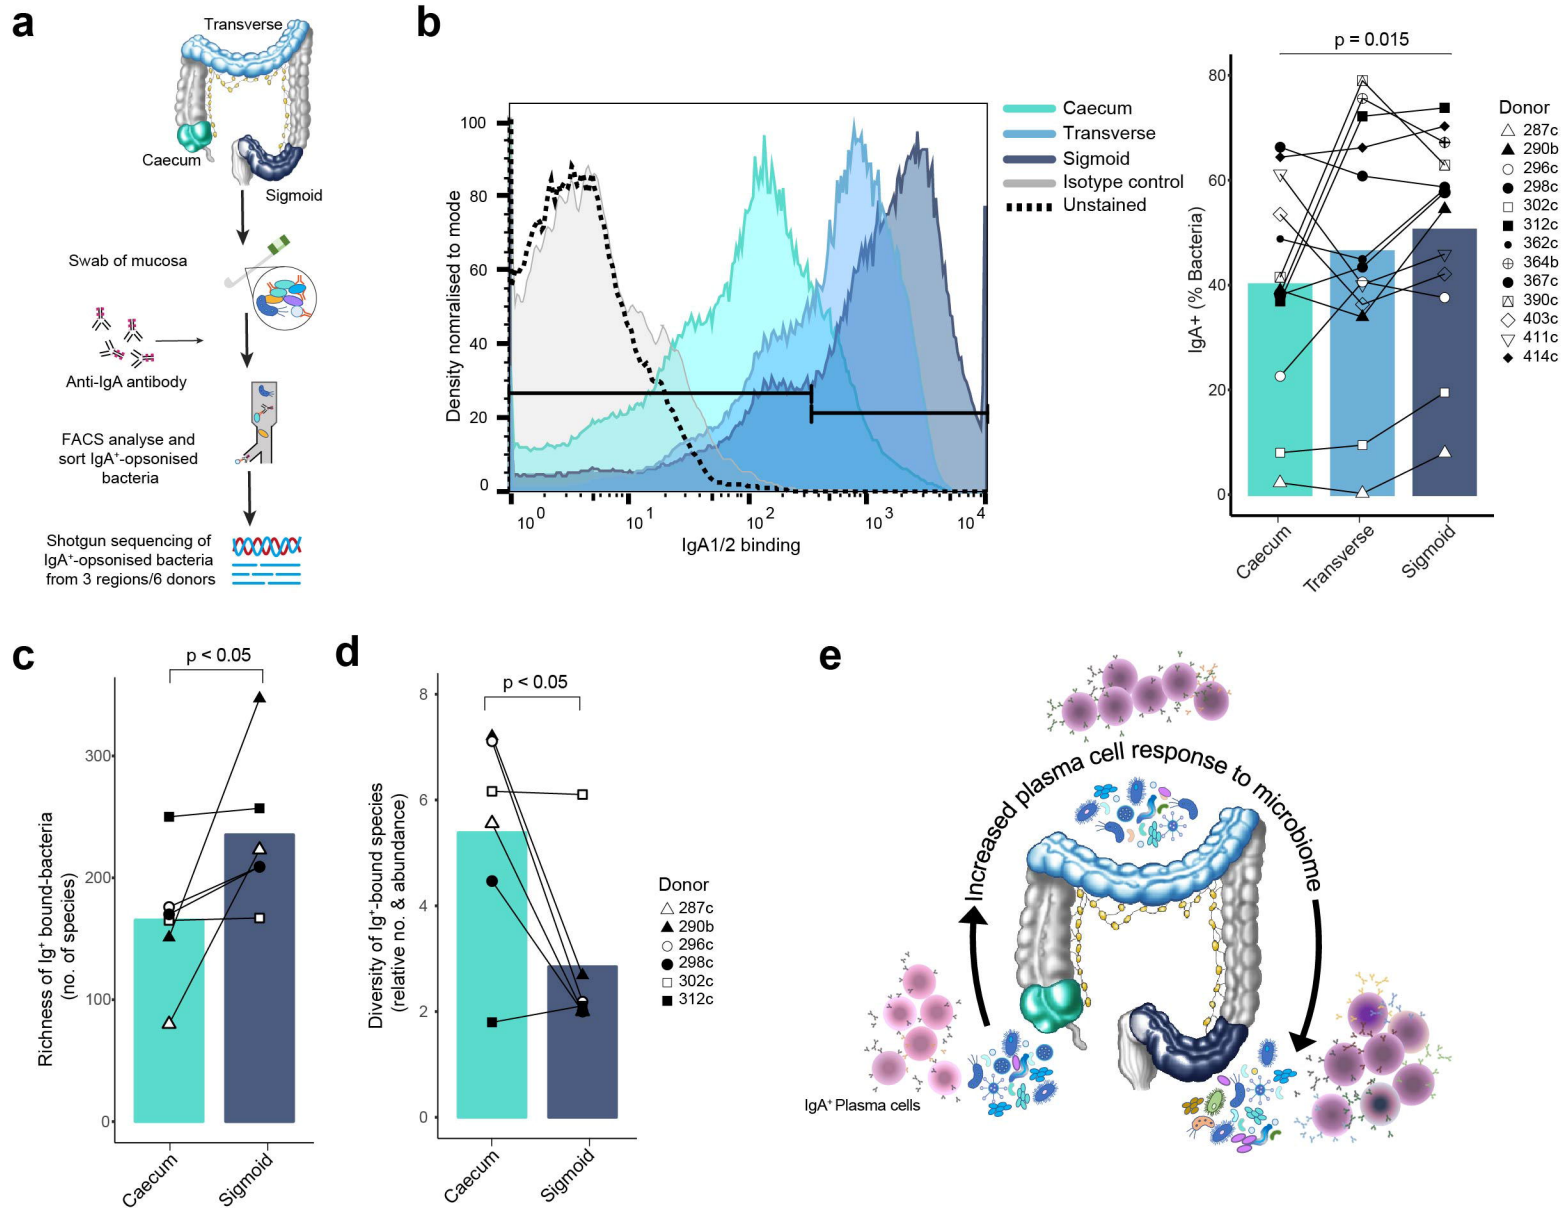

Source: https://biorxiv.org/content/biorxiv/early/2019/12/12/2019.12.12.871657.full-text.pdf
