# Supplementary material for: Distinct microbial and immune niches of the human colon
Source: bioRxiv or medRxiv preprint supplement (doi:10.1101/2019.12.12.871657), 2019-12-12

# Supp Figure 1

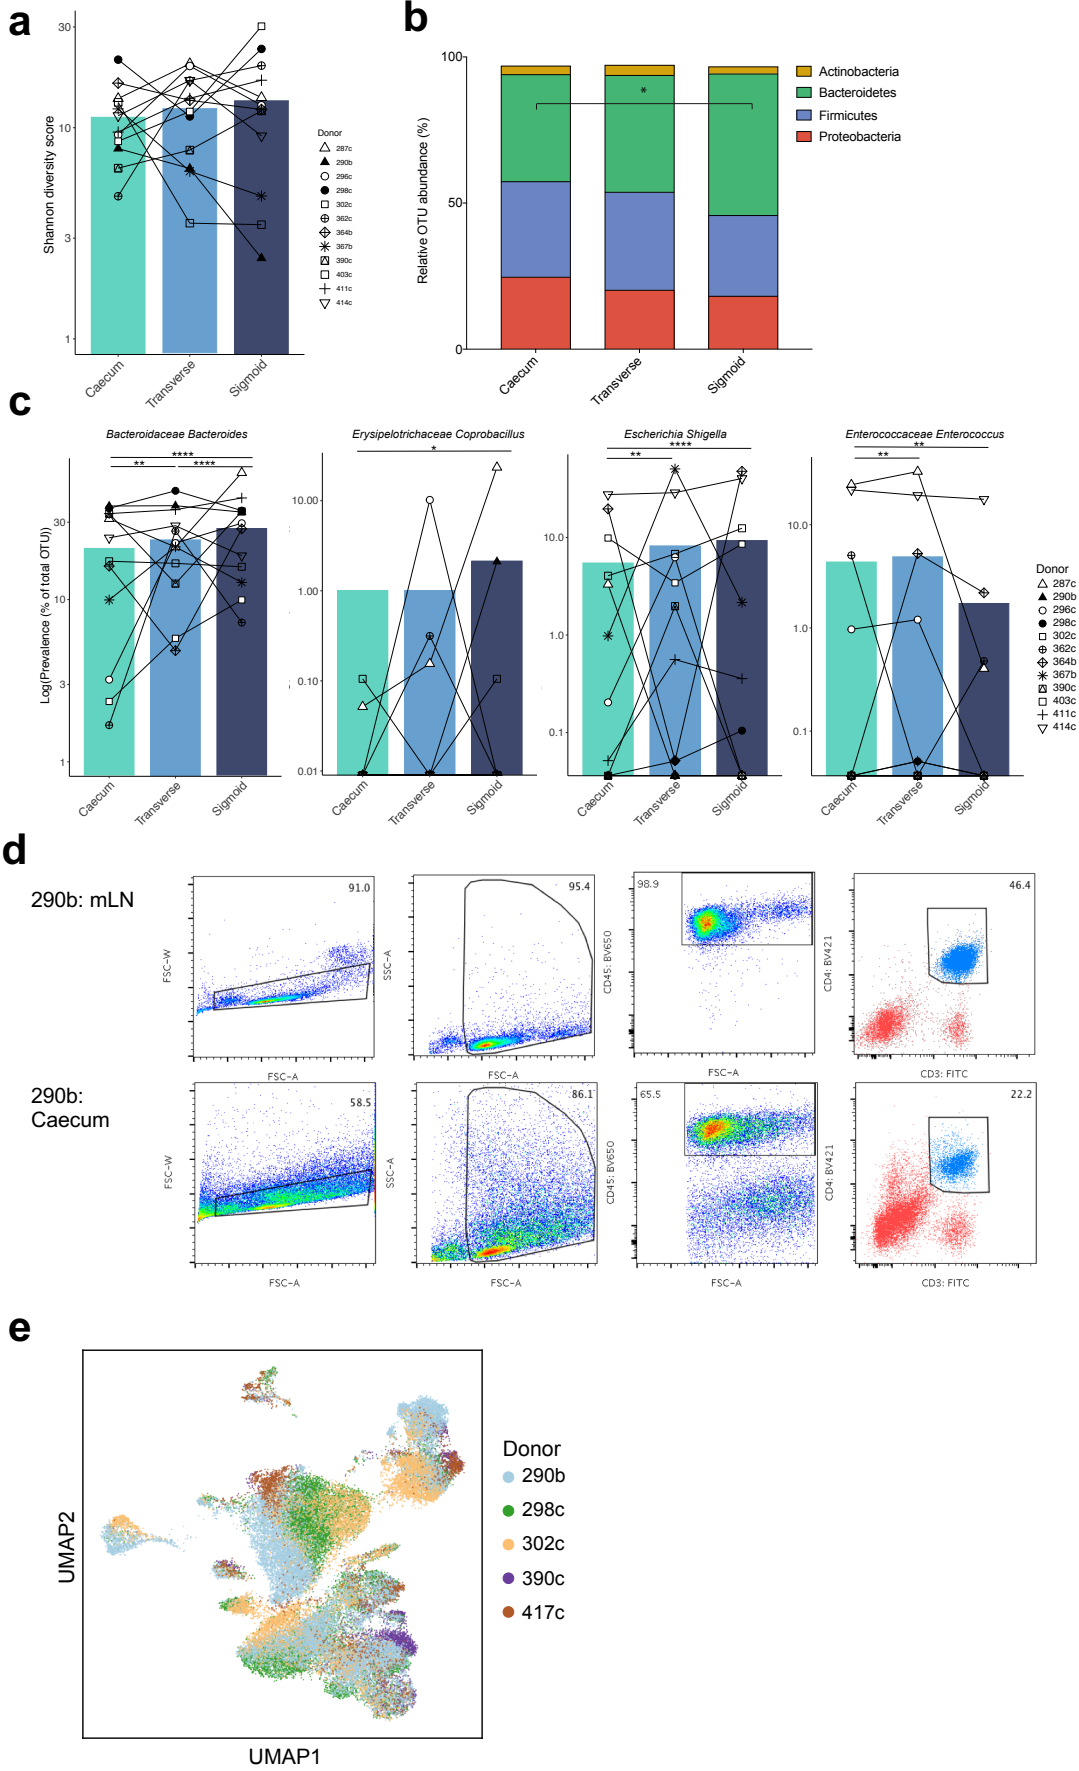

# Supp Figure 2

a

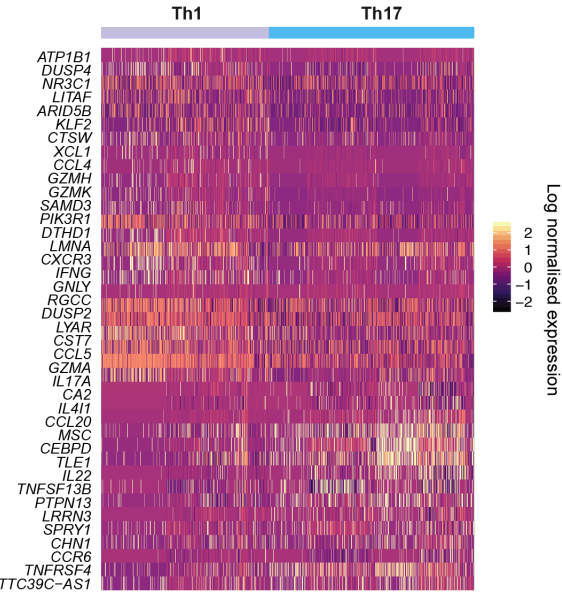

# Supp Figure 3

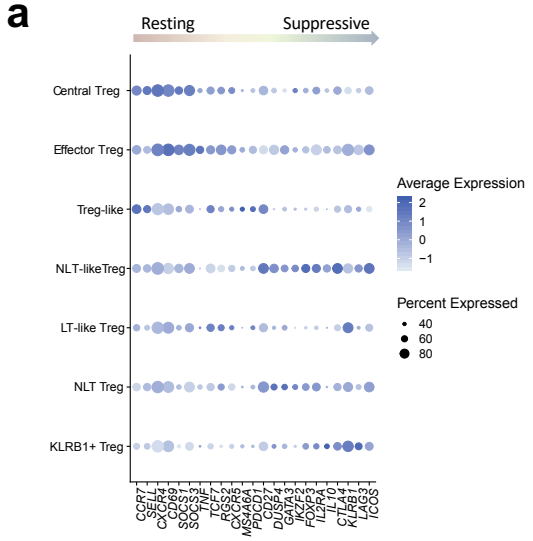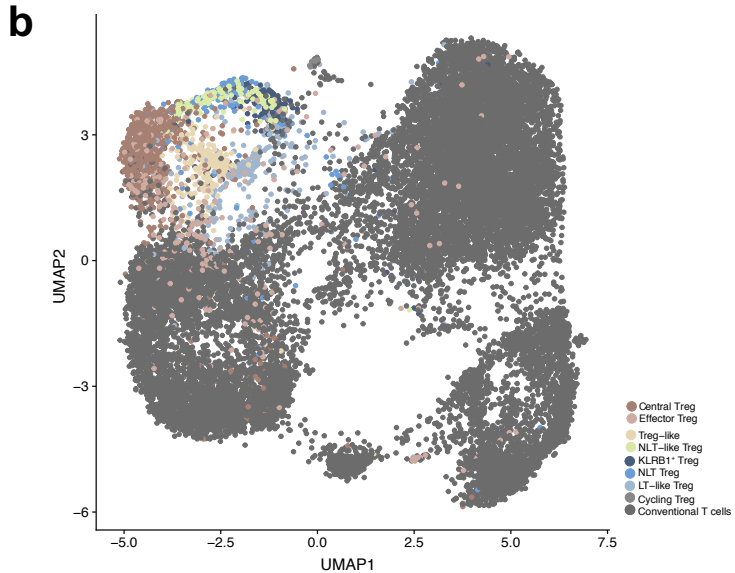

# Supp Figure 4

**a**

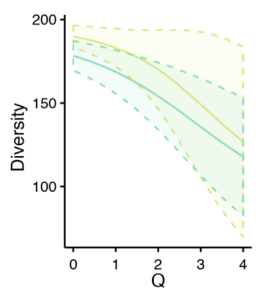

**b**

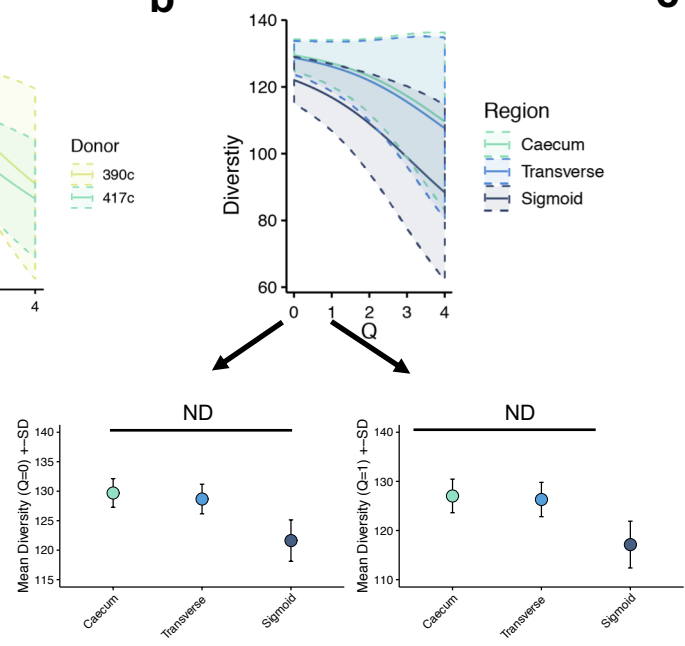

**c**

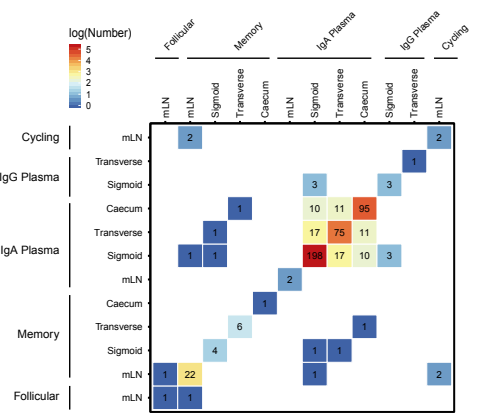

**d**

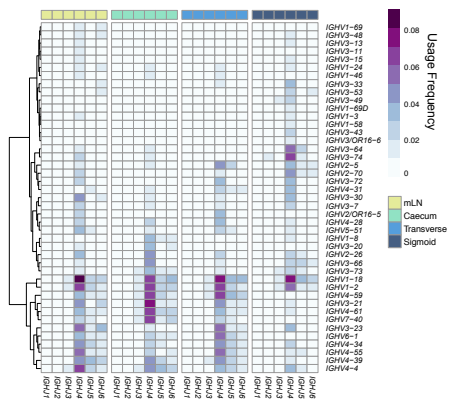

Supplement: Supplementary file [file media-1.pdf]
